# Supplementary material for: Insights to Micropsoridia Nosema bombycis congenital infection and host immune responses in the embryo and larva stages of silkworms
Source: Research Square preprint supplement (doi:10.21203/rs.3.rs-5908051/v1), 2025-04-11
Supplement: Supplementary file 1 [file 0b884d4034f4ece1d62ef0fb.docx]

Embryo stages

| Samples  _BMK ID | Total Reads | Uniq Mapped  (*N.bombycis*) | Uniq Mapped  (*B.mor*i) | Reads Ratio  (parasite/host) | %≥Q30 |
| --- | --- | --- | --- | --- | --- |
| Uninfected groups | | | | | |
| 1 dpo_1 | 89,514,792 | none | 50,948,443 (56.92%) | none | 90.36% |
| 1 dpo_2 | 83,290,382 | none | 47,570,980 (57.11%) | none | 91.01% |
| 1 dpo_3 | 82,009,192 | none | 46,502,406 (56.70%) | none | 90.38% |
| 26 hpo_4 | 97,365,752 | none | 54,757,285 (56.24%) | none | 90.90% |
| 26 hpo_5 | 97,934,282 | none | 52,991,710 (54.11%) | none | 89.10% |
| 26 hpo_6 | 85,486,986 | none | 48,918,811 (57.22%) | none | 91.19% |
| 2 dpo_7 | 8,500,9472 | none | 49,158,914 (57.83%) | none | 90.63% |
| 2 dpo_8 | 95,087,566 | none | 59,400,313 (62.47%) | none | 92.40% |
| 2 dpo_9 | 81392454 | none | 48,461,995 (59.54%) | none | 90.48% |
| 4 dpo_10 | 93,818,126 | none | 58,095,321 (61.92%) | none | 92.21% |
| 4 dpo_11 | 91,988,324 | none | 56,756,579 (61.70%) | none | 92.27% |
| 4 dpo_12 | 87,577,156 | none | 52,068,071 (59.45%) | none | 91.55% |
| 6 dpo_13 | 86,902,336 | none | 50,724,775 (58.37%) | none | 89.78% |
| 6 dpo_14 | 118,885,670 | none | 69,920,813 (58.81%) | none | 91.48% |
| 6 dpo_15 | 96,294,936 | none | 56,009,425 (58.16%) | none | 91.20% |
| 8 dpo_16 | 101,200,872 | none | 61,838,310 (61.10%) | none | 91.49% |
| 8 dpo_17 | 86,553,636 | none | 51,933,127 (60.00%) | none | 91.43% |
| 8 dpo_17 | 89,435,750 | none | 53,524,044 (59.85%) | none | 91.16% |
| 9 dpo_37 | 97,607,646 | none | 59,705,361 (61.17%) | none | 91.41% |
| 9 dpo_38 | 103,435,074 | none | 64,830,307 (62.68%) | none | 91.21% |
| 9 dpo_39 | 90,877,126 | none | 55,658,861 (61.25%) | none | 91.71% |
| Infected groups | | | | | |
| 1 dpo_19 | 87,328,018 | 327,307 (0.37%) | 49,047,226 (56.16%) | 0.67% | 91.29% |
| 1 dpo_20 | 88,967,856 | 357,435 (0.40%) | 50,483,863 (56.74%) | 0.71% | 91.43% |
| 1 dpo_21 | 101,396,684 | 653,773 (0.64%) | 59,320,290 (58.50%) | 1.10% | 91.25% |
| 26 hpo_22 | 91,339,758 | 484,500 (0.53%) | 50,092,752 (54.84%) | 0.97% | 90.85% |
| 26 hpo_23 | 88,976,312 | 473,796 (0.53%) | 48,574,534 (54.59%) | 0.98% | 91.25% |
| 26 hpo_24 | 86,096,704 | 701,636 (0.81%) | 47,301,227 (54.94%) | 1.48% | 91.43% |
| 2 dpo_25 | 113,407,740 | 78,254 (0.07%) | 70,149,542 (61.86%) | 0.11% | 91.81% |
| 2 dpo_26 | 95,931,358 | 64,404 (0.07%) | 59,222,700 (61.73%) | 0.11% | 91.95% |
| 2 dpo_27 | 97,983,620 | 82,146 (0.08%) | 60,493,077 (61.74%) | 0.14% | 92.04% |
| 4 dpo_28 | 89,358,054 | 103,388 (0.12%) | 52,608,253 (58.87%) | 0.20% | 91.87% |
| 4 dpo_29 | 112,540,312 | 134,436 (0.12%) | 67,354,097 (59.85%) | 0.20% | 90.91% |
| 4 dpo_30 | 93,657,262 | 99,525 (0.11%) | 56,303,087 (60.12%) | 0.18% | 91.05% |
| 6 dpo_31 | 89,671,276 | 128,054 (0.14%) | 53,315,586 (59.46%) | 0.24% | 91.57% |
| 6 dpo_32 | 99,299,080 | 131,164 (0.13%) | 58,685,922 (59.10%) | 0.22% | 91.47% |
| 6 dpo_33 | 96,402,964 | 146,580 (0.15%) | 56,135,915 (58.23%) | 0.26% | 90.53% |
| 8 dpo_34 | 101,483,722 | 257,390 (0.25%) | 62,142,589 (61.23%) | 0.41% | 91.41% |
| 8 dpo_35 | 93,371,996 | 244,423 (0.26%) | 57,344,969 (61.42%) | 0.43% | 91.43% |
| 8 dpo_36 | 92,497,516 | 279,434 (0.30%) | 57,263,633 (61.91%) | 0.49% | 91.40% |
| 9 dpo_40 | 116,006,808 | 354,649 (0.31%) | 69,074,023 (59.54%) | 0.51% | 90.40% |
| 9 dpo_41 | 87,871,186 | 324,152 (0.37%) | 54,195,430 (61.68%) | 0.60% | 91.35% |
| 9 dpo_42 | 95,148,210 | 333,421 (0.35%) | 56,674,745 (59.56%) | 0.59% | 90.90% |

Larval stage

| Samples  _BMK ID | Total Reads | Uniq Mapped  (*N.bombycis*) | Uniq Mapped  (*B.mor*i) | Reads Ratio  (parasite/host) | %≥Q30 |
| --- | --- | --- | --- | --- | --- |
| Uninfected groups | | | | | |
| 5 dph_1 | 49,901,014 | none | 41,478,652 (83.12%) | none | 94.80% |
| 5 dph_2 | 46,274,096 | none | 39,260,284 (84.84%) | none | 94.76% |
| 5 dph_3 | 40,733,164 | none | 34,703,956 (85.20%) | none | 94.73% |
| 10 dph_10 | 45,973,538 | none | 39,500,464 (85.92%) | none | 95.19% |
| 10 dph_11 | 46,670,144 | none | 38,688,106 (82.90%) | none | 95.08% |
| 10 dph_12 | 59,493,080 | none | 51,194,507 (86.05%) | none | 95.05% |
| Infected groups |  |  |  |  |  |
| 5 dph_4 | 62,965,044 | 2,110,417 (3.35%) | 52,126,259 (82.79%) | 4.04% | 95.11% |
| 5 dph_5 | 51,040,778 | 3,660,752 (7.17%) | 39,963,486 (78.30%) | 9.16% | 94.69% |
| 5 dph_6 | 51,221,760 | 1,923,739 (3.76%) | 41,794,629 (81.60%) | 4.60% | 94.71% |
| 10 dph_7 | 63,967,612 | 8,113,889 (12.68%) | 45,872,477 (71.71%) | 17.68% | 94.27% |
| 10 dph_8 | 56,118,200 | 7,792,662 (13.89%) | 39,917,696 (71.13%) | 19.52% | 94.82% |
| 10 dph_9 | 67,157,524 | 8,876,063 (13.22%) | 46,430,941 (69.14%) | 19.11% | 94.62% |
