# Supplementary material for: Insights to Micropsoridia Nosema bombycis congenital infection and host immune responses in the embryo and larva stages of silkworms
Source: Research Square preprint supplement (doi:10.21203/rs.3.rs-5908051/v1), 2025-04-11
Supplement: Supplementary file 2 [file 4503bfaeff0daadfba8e8027.docx]

Gene IDs of the NbSerpin genes

| Gene Name | Gene ID |
| --- | --- |
| NbSPN 1 | NBO_13g0021 |
| NbSPN 2 | NBO_18g0004 |
| NbSPN 3 | NBO_18g0021 |
| NbSPN 4 | NBO_19g0007 |
| NbSPN 5 | NBO_19g0009 |
| NbSPN 6 | NBO_34g0030 |
| NbSPN 7 | NBO_34g0036 |
| NbSPN 8 | NBO_35g0002 |
| NbSPN 10 | NBO_42g0006 |
| NbSPN 11 | NBO_44g0004 |
| NbSPN 12 | NBO_44g0006 |
| NbSPN 13 | NBO_124g0001 |
| NbSPN 15 | NBO_1038g0001 |
| NbSPN 16 | NBO_1125g0001 |
| NbSPN 17 | NBO_1147g0001 |
| NbSPN 18 | NBO_1569g0001 |
| NbSPN 19 | NBO_1570g0002 |
