# Supplementary material for: Insights to Micropsoridia Nosema bombycis congenital infection and host immune responses in the embryo and larva stages of silkworms
Source: Research Square preprint supplement (doi:10.21203/rs.3.rs-5908051/v1), 2025-04-11
Supplement: Supplementary file 3 [file 96faf40cb6b14331ddacd34e.docx]

| **Primers** | **5’→3’** |
| --- | --- |
| 011213F | GCTCTGTCCTATCCCCACTTCT |
| 011213R | CCGTGTTCGTGATGCTTGAT |
| 011212F | GAAGGTATTCGGCGGACAA |
| 011212R | TGACCCTGTTTCCGCCTTT |
| 010439F | TTTGGTTGTCCTCTGCGTTG |
| 010439R | TGATGTCGTCAGTCAGGAGGTC |
| 000010F | TGCCGAACAAGACTCTGACC |
| 000010R | GCGATGATGCCCAAGAATAG |
| 000045F | CTGAACGAGATAGCACCTTGGA |
| 000045R | CGCTGTGGCTAATGCTTTGAG |
| 000583F | GAGCAGGGTGATTAGAGCGTT |
| 000583R | CACTCTGCCGTCATTTCCAA |
| 008038F | CCATCGGAGTCGCATTCAT |
| 008038R | GCTCGTCCGTGTTGAAGTTG |
| 012864F | CACCACTCAAACTAATCAACCGC |
| 012864R | GTAATCGGATCGGATGTGACC |
| 012764F | TGGAACTGCCCTACAACGAG |
| 012764R | CTGTCTAAGTCACGGAGAAACGA |
| 011516F | TCAGTTTCTTCTGCGTGGTGC |
| 011516R | GATTTTCCCGATGCCCTTAG |
| 011519F | CGATGCTCGTCCTCATAATGG |
| 011519R | GATTTTCCCGATGCCCTTAG |
| 004577F | CGATTTAATGACGATGCTGGC |
| 004577R | TGGTGGTCTGTTTCTGGGATG |
| 008021F | CCTGGACCTGTTATTGATCTTCG |
| 008021R | AATAGGGGCGTCCTCAGATG |
| 000311F | CTCCAAGACACGGTGAGATTTT |
| 000311R | CGACTTCTTTCAGTGGCTCAA |
| 009392F | GGAGACAACTTCATCGCCAAC |
| 009392R | GAGTCTGGTTTTGTGGTCGGT |
| 014431F | CCCCATCTTGCTGGACTTGT |
| 014431R | AAGATGTGACTCTGGCGAAGG |
| 002747F | CACAGTGAACTCGGATGGAACC |
| 002747R | CGCTCAGGTCGTGGTTGTTAT |
| 010439F | TTTGGTTGTCCTCTGCGTTG |
| 010439R | TGATGTCGTCAGTCAGGAGGTC |
| 013864F | GCCAATAAGAATGCGGAAGC |
| 013864R | CACTCCTGAACCTGTTGCTGTC |
| 006280F | TGAGAAAGTGGGACGCAACG |
| 006280R | GGATTTCGCTTGCCCTATGA |
| 000037F | TCCTATCCTTCGTCTTCGCTC |
| 000037R | CTTTAGCCGAACCAAGGACC |
| 011408F | TGTCCGTGATGGGGCTTAT |
| 011408R | CCCCAGAACCTGTCTATTTGAA |
| 006768F | GATTGCGTCGTCATCCATAGA |
| 006768R | CATTGAGCCGCAAAGTTCC |
| 011409F | TTTCCCAATGGTGTCGTCC |
| 011409R | ATCGTTAGGGGCGGCAGTAT |
| 012866F | TCCTTAGGCTGGGGTGACAT |
| 012866R | GTTGAAACCTCTTCCAGCAGC |
| 005582F | TGCGTGCTTGGAAGTAGGTG |
| 005582R | TTCCTTAGTGGATGGGTGAGC |
| 005977F | GGTTGGTGGTGGCTTTCGTA |
| 005977R | CATCGGTTCCGTATCTGATTAGTG |
| 006623F | GGCGTATCTTATTCCAGGCAC |
| 006623R | GTCATTCAGTTTGCCGTCGT |
| 013669F | ATGCCACCCACCCATATCTAC |
| 013669R | TCGGCTTGCTGTCTGTGGTA |
| 011524F | ATCCTCATGCGAGTCCTCAAC |
| 011524R | TTAGCCCTCCGTCGCAATA |
| 009047F | TGTGCGGAACTGATGGGAA |
| 009047R | CCGAGTCTGGAGTCATTGATTGT |
| 007987F | TTGGTGTTCTTGGTGAGTTTCG |
| 007987R | GCAATCGTTGGATACCGTGT |
| BmActinA3F | CGGGAAATCGTTCGTGA |
| BmActinA3R | ACGAGGGTTGGAAGAGGG |
