# Supplementary material for: Insights to Micropsoridia Nosema bombycis congenital infection and host immune responses in the embryo and larva stages of silkworms
Source: Research Square preprint supplement (doi:10.21203/rs.3.rs-5908051/v1), 2025-04-11
Supplement: Supplementary file 4 [file 97b2944949f80a9ca0eb9b24.docx]

| Samples  _GDR ID | Total Reads | Uniq Mapped  (*N. bombycis*) | Uniq Mapped  (*B. mori*) | Reads Ratio  (parasite/host) | %≥Q30 |
| --- | --- | --- | --- | --- | --- |
| Uninfected groups | | | | | |
| 1 dpo_CKE1-1 | 85,252,972 | None | 74,700,391  (87.62%) | None | 93.94% |
| 1 dpo_CKE1-2 | 80,723,024 | None | 70,807,492  (87.72%) | None | 94.32% |
| 1 dpo_CKE1-3 | 83,958,628 | None | 73,435,725  (87.47%) | None | 93.99% |
| 2 dpo_CKE2-1 | 76,405,224 | None | 65,834,040  (86.16%) | None | 93.55% |
| 2 dpo_CKE2-2 | 73,674,934 | None | 63,525,712  (86.22%) | None | 94.07% |
| 2 dpo_CKE2-3 | 78,774,536 | None | 67,865,192  (86.15%) | None | 93.90% |
| 3 dpo_CKE3-1 | 83,162,446 | None | 71,832,840  (86.38%) | None | 94.33% |
| 3 dpo_CKE3-2 | 78,335,282 | None | 67,719,845  (86.45%) | None | 94.03% |
| 3 dpo_CKE3-3 | 82,394,262 | None | 71,142,706  (86.34%) | None | 94.01% |
| 5 dpo_CKE5-1 | 79,588,320 | None | 68,335,104  (85.86%) | None | 93.80% |
| 5 dpo_CKE5-2 | 87,328,256 | None | 74,529,403  (85.34%) | None | 94.05% |
| 5 dpo_CKE5-3 | 75,535,354 | None | 65,245,950  (86.38%) | None | 94.08% |
| 7 dpo_CKE7-1 | 85,673,978 | None | 74,331,234 (86.76%) | None | 94.11% |
| 7 dpo_CKE7-2 | 80,330,072 | None | 69,772,871  (86.86%) | None | 94.07% |
| 7 dpo_CKE7-3 | 72,896,090 | None | 62,706,118  (86.02%) | None | 93.91% |
| 1 dph_CKL1-1  (9 dpo) | 90,780,734 | None | 78,544,690  (86.52%) | None | 96.27% |
| 1 dph_CKL1-2  (9 dpo) | 97,234,638 | None | 84,531,295  (86.94%) | None | 96.18% |
| 1 dph_CKL1-3  (9 dpo) | 85,062,420 | None | 73,632,334  (86.56%) | None | 96.09% |
| 2 dph_CKL2-1 | 90,144,930 | None | 77,149,616  (85.58%) | None | 96.08% |
| 2 dph_CKL2-2 | 88,191,764 | None | 74,946,989  (84.98%) | None | 95.84% |
| 2 dph_CKL2-3 | 87,056,554 | None | 73,574,869  (84.51%) | None | 96.11% |
| 3 dph_CKL3-1 | 83,085,280 | None | 71,852,712  (86.48%) | None | 95.98% |
| 3 dph_CKL3-2 | 89,543,230 | None | 77,139,002  (86.15%) | None | 96.29% |
| 3 dph_CKL3-3 | 69,995,324 | None | 60,060,590  (85.81%) | None | 96.15% |
| Infected groups | | | | | |
| 1 dpo_TE1-1 | 83,979,202 | 480,704  (0.56%) | 71,781,100  (85.47%) | 0.67% | 96.15% |
| 1 dpo_TE1-2 | 71,608,000 | 495,963  (0.63%) | 59,303,855  (82.82%) | 0.84% | 94.15% |
| 1 dpo_TE1-3 | 73,445,744 | 385,036  (0.51%) | 62,516,325  (85.12%) | 0.62% | 94.03% |
| 2 dpo_TE2-1 | 75,816,180 | 908,541  (1.18%) | 64,707,793  (85.35%) | 1.40% | 94.07% |
| 2 dpo_TE2-2 | 74,375,010 | 821,804  (1.07%) | 63,013,147  (84.72%) | 1.30% | 94.07% |
| 2 dpo_TE2-3 | 71,879,778 | 569,589  (0.78%) | 61,577,065  (85.67%) | 0.93% | 94.39% |
| 3 dpo_TE3-1 | 100,814,990 | 1,706,613  (1.66%) | 85,045,175  (84.36%) | 2.01% | 94.43% |
| 3 dpo_TE3-2 | 117,108,296 | 2,158,705  (1.78%) | 95,364,753  (81.43%) | 2.26% | 90.63% |
| 3 dpo_TE3-3 | 91,157,948 | 1,890,930  (2.01%) | 74,846,878  (82.11%) | 2.53% | 91.31% |
| 5 dpo_TE5-1 | 101,030,456 | 587,954  (0.55%) | 83,627,893  (82.77%) | 0.7% | 91.31% |
| 5 dpo_TE5-2 | 113,026,122 | 742,739  (0.64%) | 94,399,914  (83.52%) | 0.79% | 91.23% |
| 5 dpo_TE5-3 | 108,343,900 | 788,259  (0.71%) | 90,109,683  (83.17%) | 0.87% | 90.69% |
| 7 dpo_TE7-1 | 118,784,938 | 787,260  (0.65%) | 101,093,703  (85.11%) | 0.78% | 91.3% |
| 7 dpo_TE7-2 | 104,799,400 | 856,733  (0.80%) | 88,593,444  (84.54%) | 0.97% | 90.69% |
| 7 dpo_TE7-3 | 71,145,828 | 511,073  (0.70%) | 59,301,608  (83.35%) | 0.86% | 90.77% |
| 1 dph_TL1-1 | 90,392,168 | 1,644,781  (1.79%) | 75,095,961  (83.08%) | 2.19% | 90.55% |
| 1 dph_TL1-2 | 97,002,616 | 2,109,558  (2.11%) | 79,831,335  (82.30%) | 2.64% | 90.84% |
| 1 dph_TL1-3 | 94,569,088 | 1,691,896  (1.74%) | 78,981,005  (83.52%) | 2.14% | 91.29% |
| 2 dph_TL2-1 | 83,886,768 | 2,479,957  (2.91%) | 69,249,938  (82.55%) | 3.58% | 91.01% |
| 2 dph_TL2-2 | 86,478,178 | 2,305,154  (2.59%) | 70,709,866  (81.77%) | 3.26% | 91.41% |
| 2 dph_TL2-3 | 91,488,790 | 2,455,052  (2.64%) | 75,872,856  (82.93%) | 3.24% | 91.40% |
| 3 dph_TL3-1 | 81,937,174 | 3,702,420  (4.39%) | 65,975,392  (80.52%) | 5.61% | 91.24% |
| 3 dph_TL3-2 | 84,669,758 | 3,679,048  (4.23%) | 68,073,772  (80.40%) | 5.4% | 90.88% |
| 3 dph_TL3-3 | 89,833,234 | 4,783,738  (5.20%) | 71,358,213  (79.43%) | 6.7% | 90.69% |
