# Supplementary material for: Insights to Micropsoridia Nosema bombycis congenital infection and host immune responses in the embryo and larva stages of silkworms
Source: Research Square preprint supplement (doi:10.21203/rs.3.rs-5908051/v1), 2025-04-11
Supplement: Supplementary file 5 [file aab49524c24082d617c384b5.docx]

Fig. S1 Phylogenetic tree of thioredoxins with predicted signal peptides constructed based on multiple sequence alignment generated by ClustalW and employing the Neighbor-Joining method. Branch lengths represent evolutionary distances, and branch nodes signify common ancestors. Protein sequences were obtained from NCBI and subjected to a BLASTP search using thioredoxin from *Nosema bombycis*. Sequences lacking signal peptides or those not annotated as thioredoxin-related proteins were excluded from the analysis. Phylogenetic analysis was performed using MEGA11 under the Poisson correction model. Branch colorings are used to differentiate species origins. Thioredoxins were annotated as protein disulfide isomerase in some of genome.


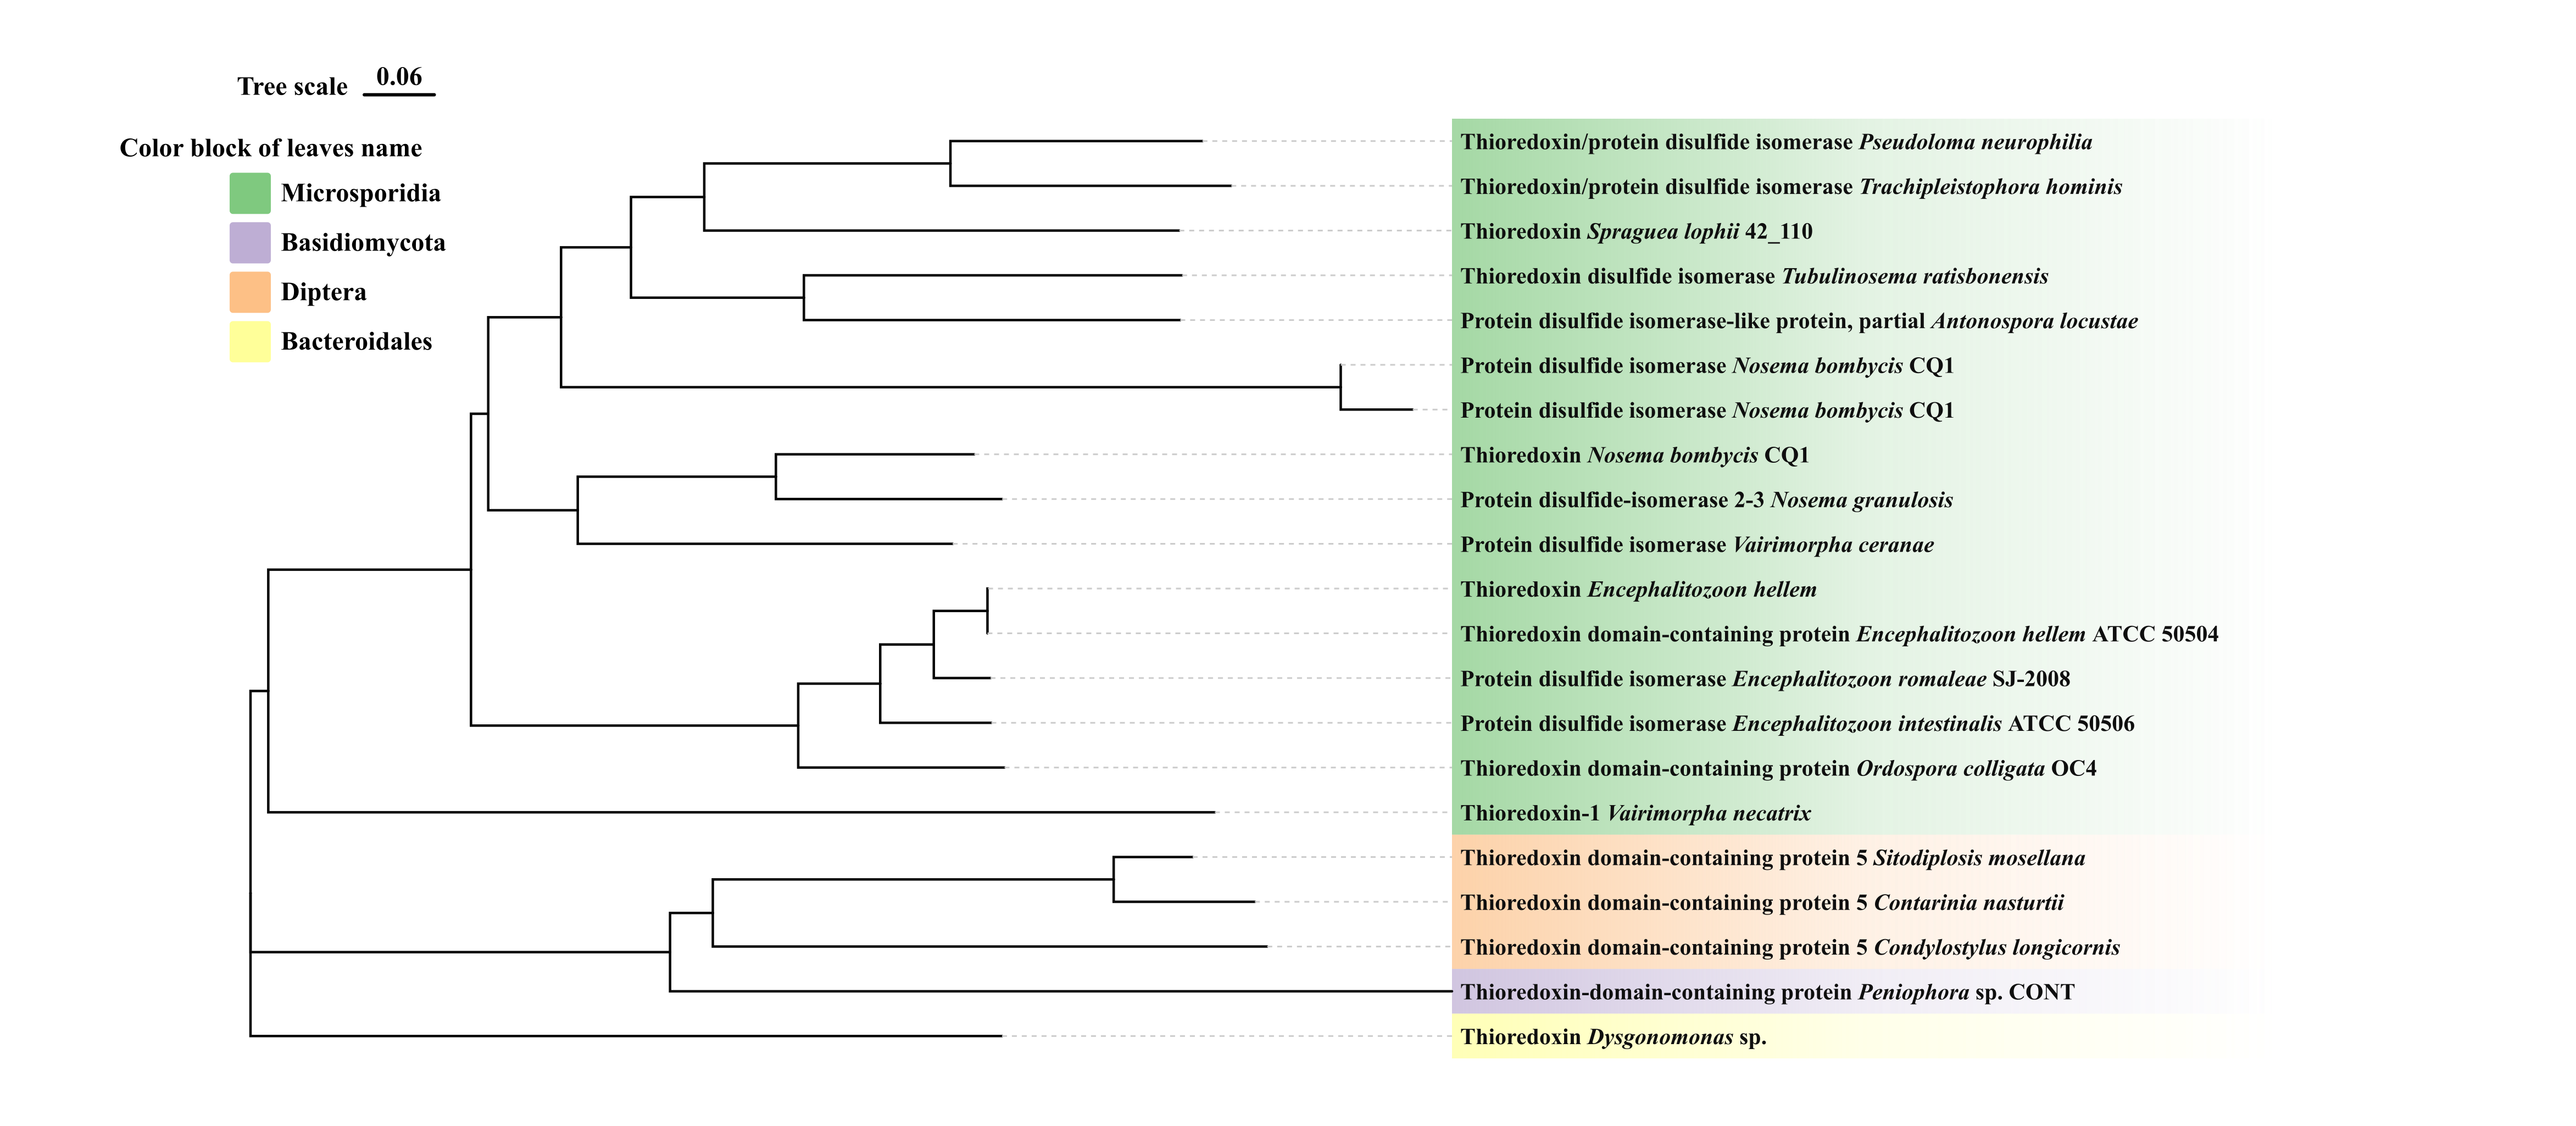


Fig. S2 Volcano plot of differentially expressed genes (DEGs) identified in embryos and larvae of diapause (A) or non-diapause (B) silkworm *Bombyx mori* with *N. bombycis* infection compare to healthy controls. A: DEGs of diapause silkworm embryos and larvae. B:DEGs of non-diapause silkworm embryos and larvae.


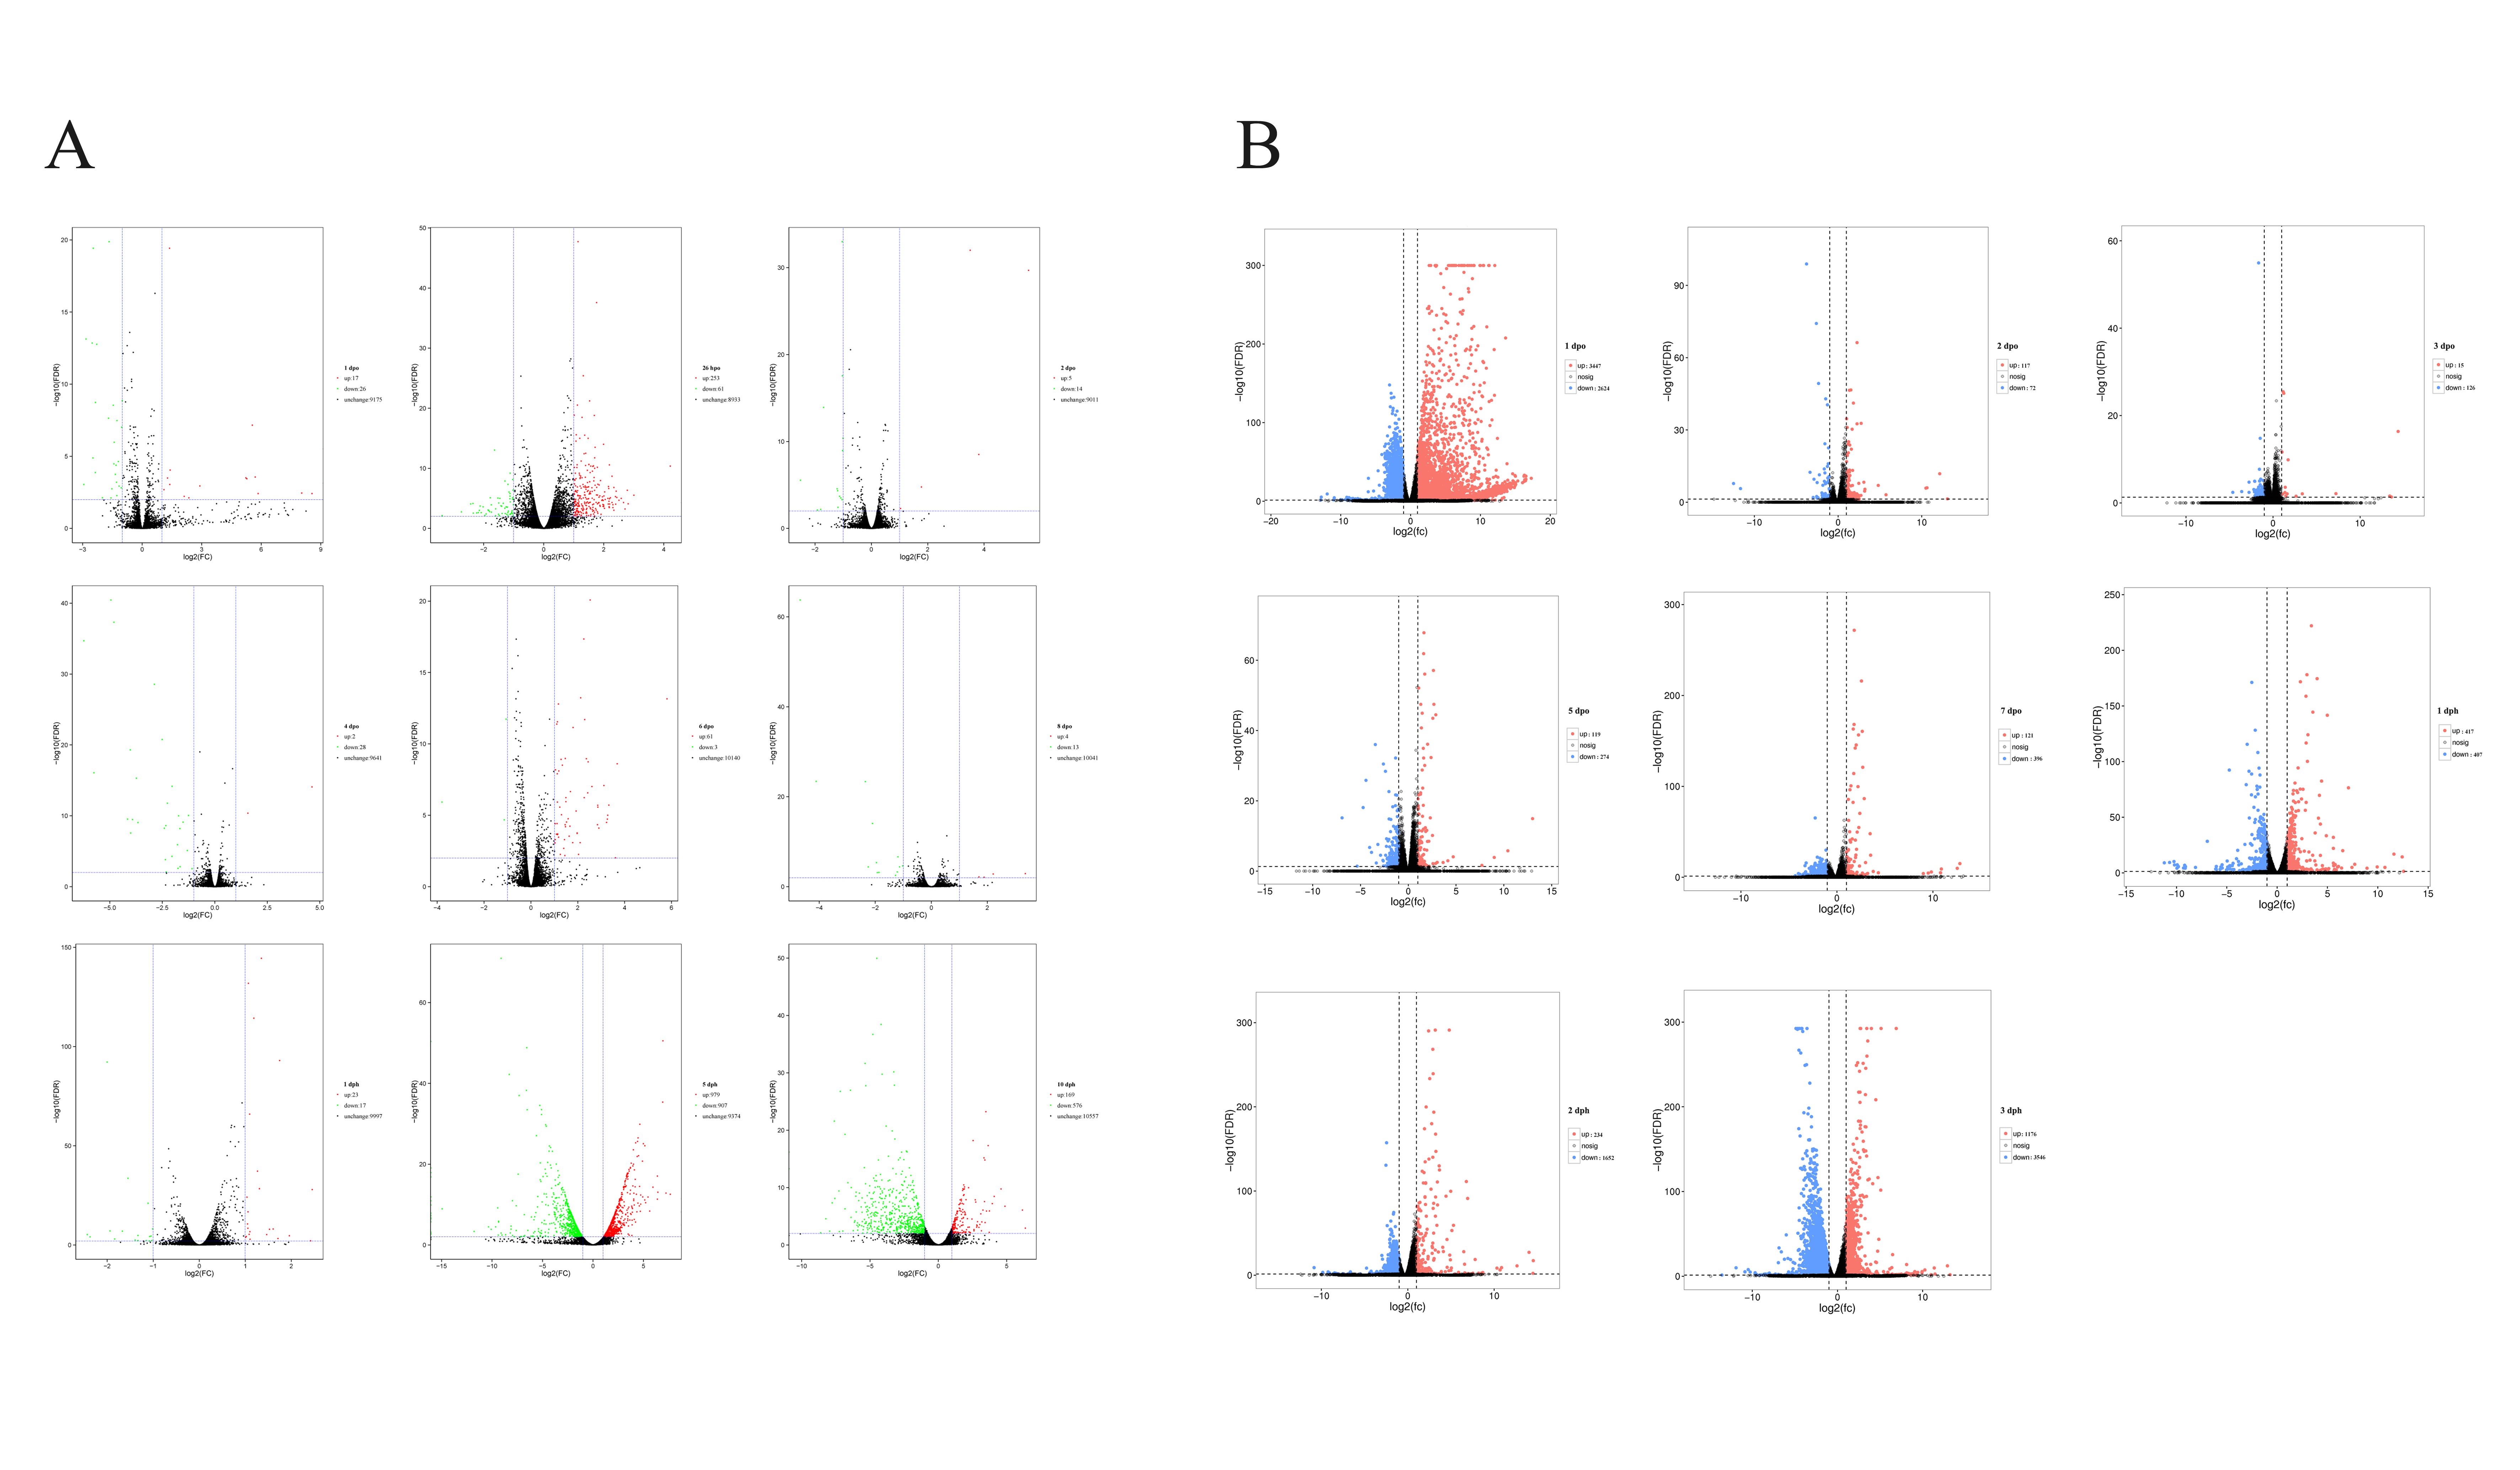


Fig. S3 Phylogenetic tree and expression analysis of *PRGPs* protein family members in silkworm *B. mori* congenitally infected with *N. bombycis*. The phylogenetic tree was constructed using the maximum likelihood (ML) and the Jones-Taylor-Thornton (JTT) model of amino acid substitution in MEGA11. Branch lengths represent evolutionary distances derived from multiple sequence alignments. Protein sequences were sourced from SilkDB 3.0, with signal peptide-containing proteins highlighted in red.Colored blocks indicate conserved domains or superfamilies, with each color representing a distinct superfamily and horizontal lines denoting protein length in amino acids. Two heatmaps adjacent to the domain structures show the differential expression of *PGRPs* in non-diapause and diapause silkworms. Each column represents a time-point, each row represents a gene. Significant upregulation is marked by “+”, while significant downregulation by “-”.


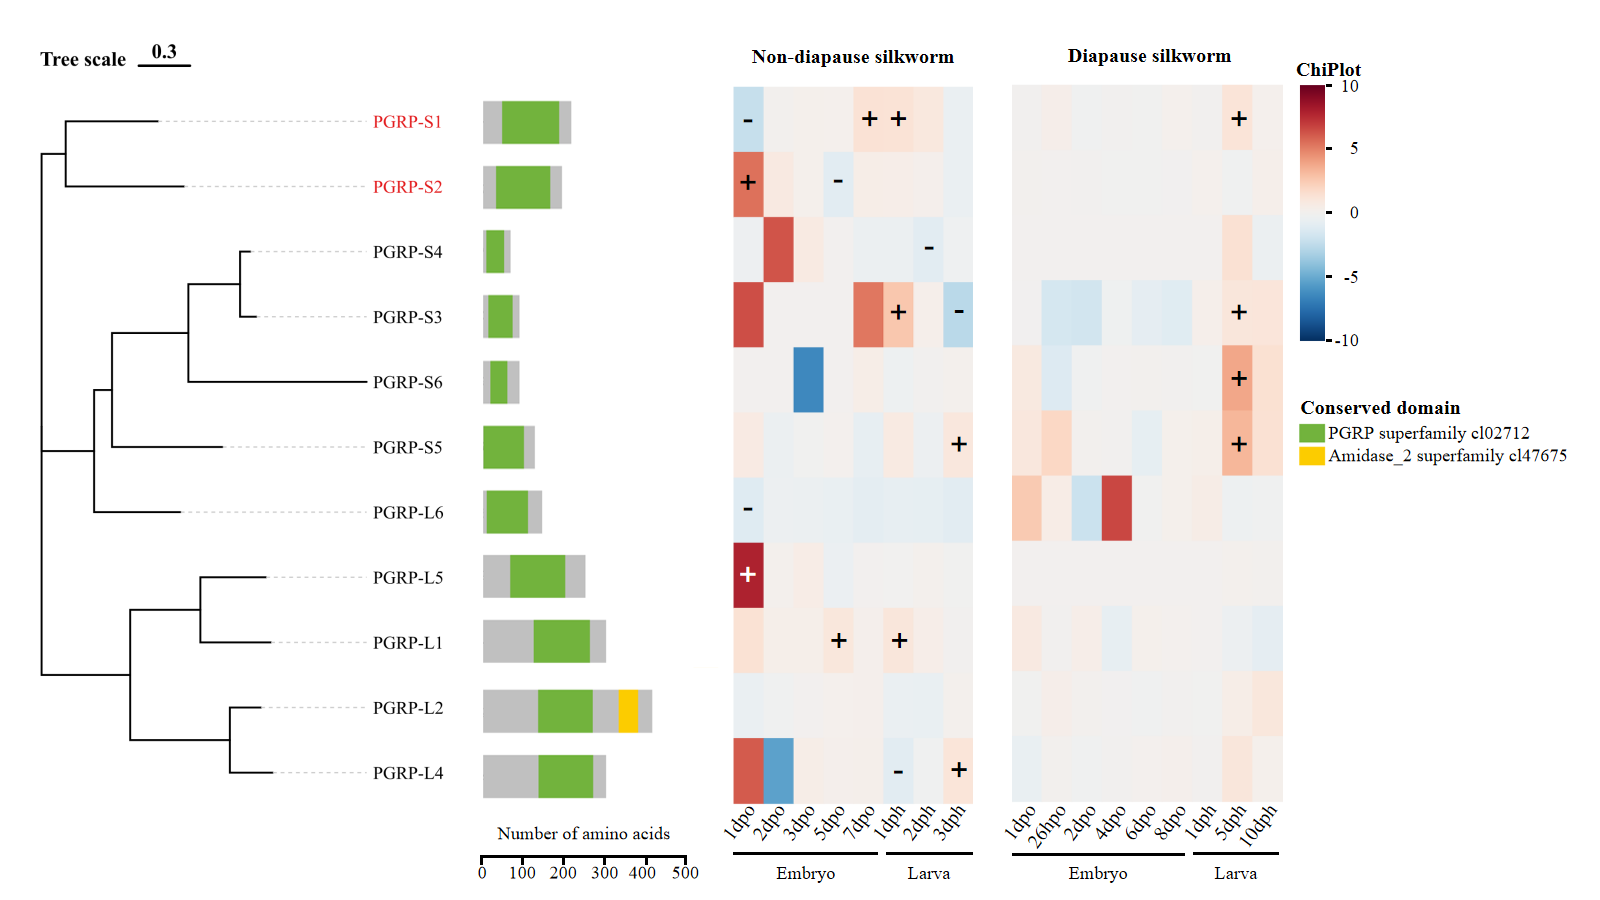


Fig. S4 Phylogenetic tree and expression analysis of *CTLs* protein family members in the silkworms with *N. bombycis* congenital infection. The phylogenetic tree was constructed using the maximum likelihood (ML) method and the JTT protein evolution model in MEGA11. Proteins containing signal peptides are highlighted in red. Colored blocks adjacent to each leaf indicate conserved domains or superfamilies within the corresponding proteins. Each color represents a distinct superfamily, with horizontal lines beneath the blocks denoting the amino acid length of the protein. Two heatmaps adjacent to the domain structures show the differential expression of *CTLs* in non-diapause or diapause silkworms. Each column represents a time-point, each row represents a gene. Significant upregulation relative to controls is indicated with a “+”, while significant downregulation with a “-”.


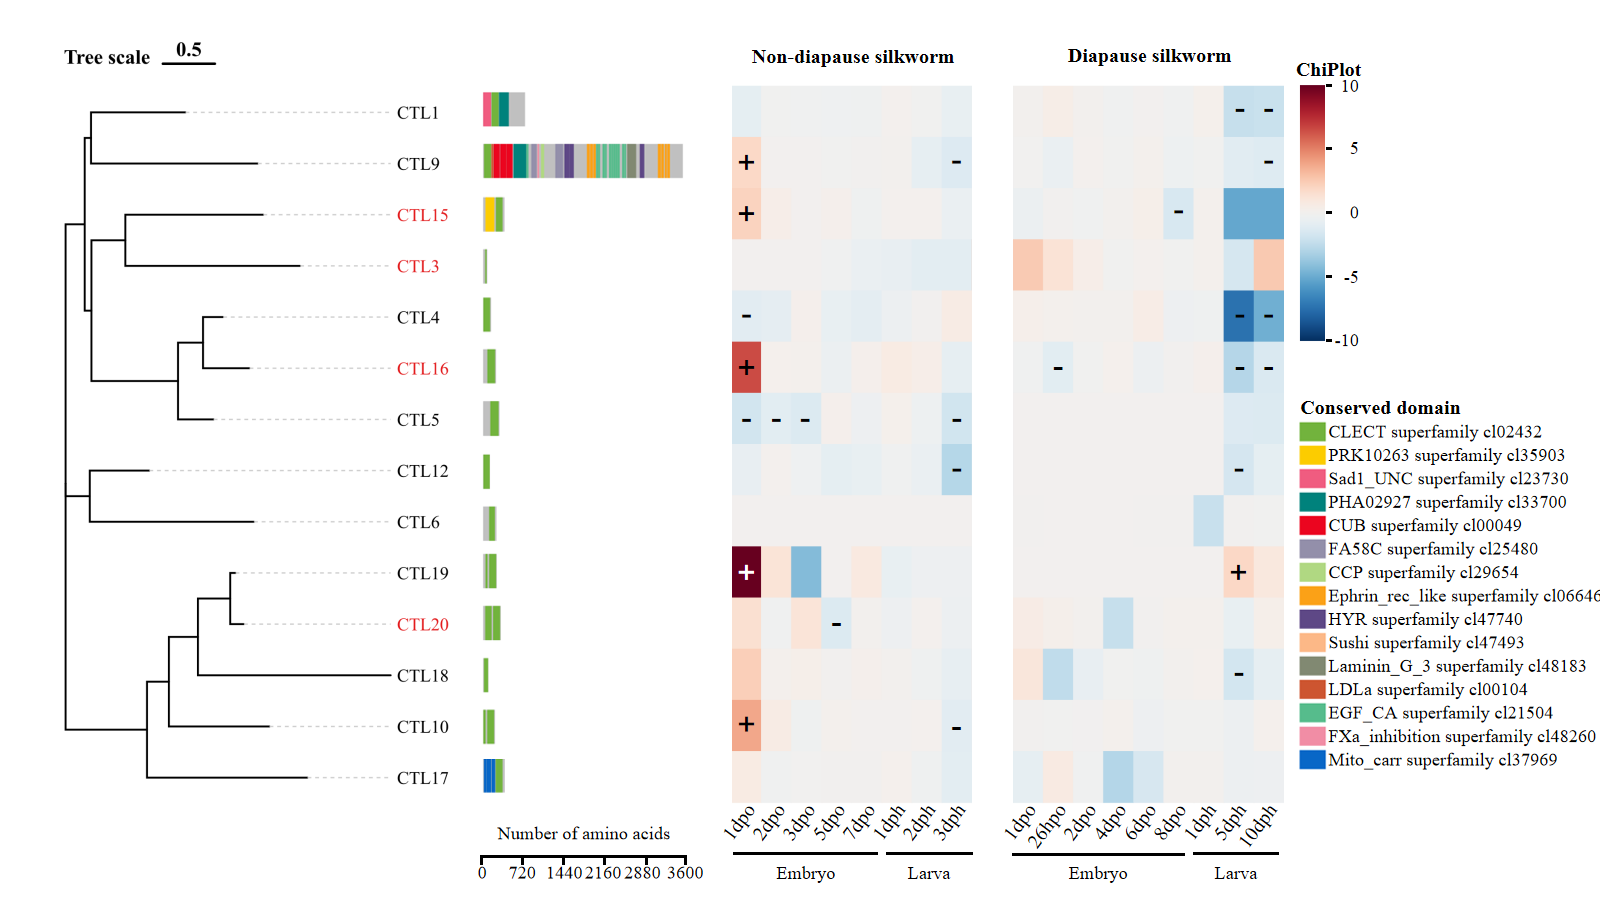


Fig. S5 Phylogenetic tree and expression analysis of *SCRs* protein family members in the silkworms with *N. bombycis* congenital infection. The phylogenetic tree was constructed using the maximum likelihood (ML) method and the JTT protein evolution model in MEGA11. Proteins containing signal peptides are highlighted in red. Colored blocks adjacent to each leaf indicate conserved domains or superfamilies within the corresponding proteins. Each color represents a distinct superfamily, with horizontal lines beneath the blocks denoting the amino acid length of the protein. Two heatmaps adjacent to the domain structures show the differential expression of *SCRs* in non-diapause or diapause silkworms. Each column represents a time-point, each row represents a gene. Significant upregulation relative to controls is indicated with a “+”, and significant downregulation with a “-”.


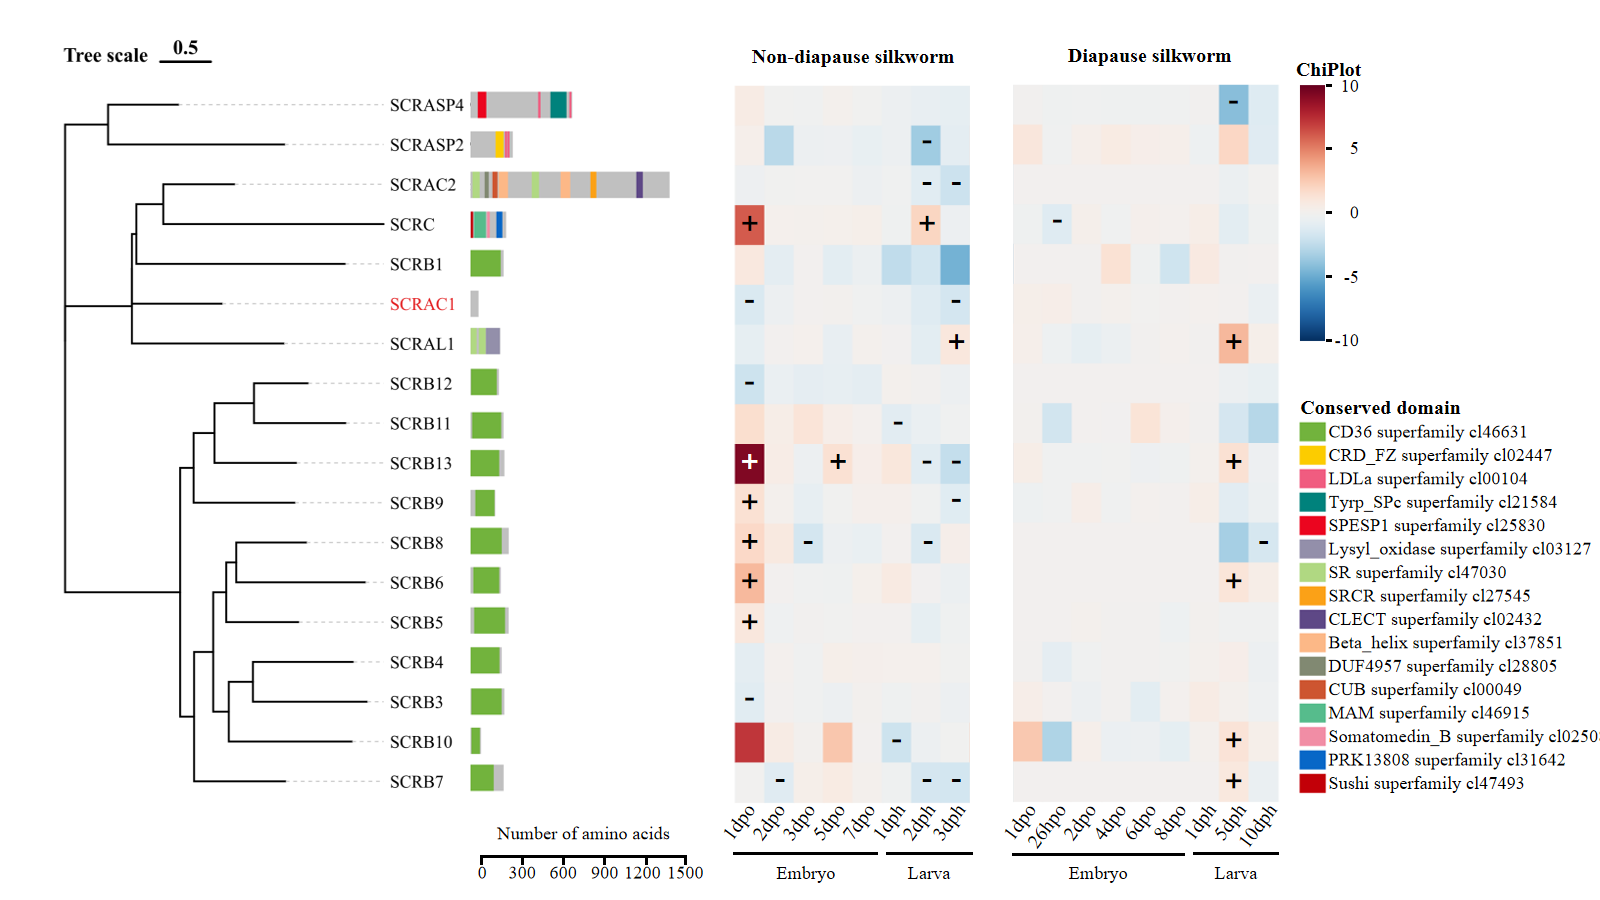


Fig. S6 Phylogenetic tree and expression analysis of *CLIPs* protein family members in the silkworms with *N. bombycis* congenital infection. The phylogenetic tree was constructed using the maximum likelihood (ML) method and the JTT protein evolution model in MEGA11. Proteins containing signal peptides are highlighted in red. Colored blocks adjacent to each leaf indicate conserved domains or superfamilies within the corresponding proteins. Each color represents a distinct superfamily, with horizontal lines beneath the blocks denoting the amino acid length of the protein. Two heatmaps adjacent to the domain structures show the differential expression of *CLIPs* in non-diapause or diapause silkworms. Each column represents a time-point, each row represents a gene. Significant upregulation relative to controls is indicated with a “+”, and significant downregulation with a “-”.


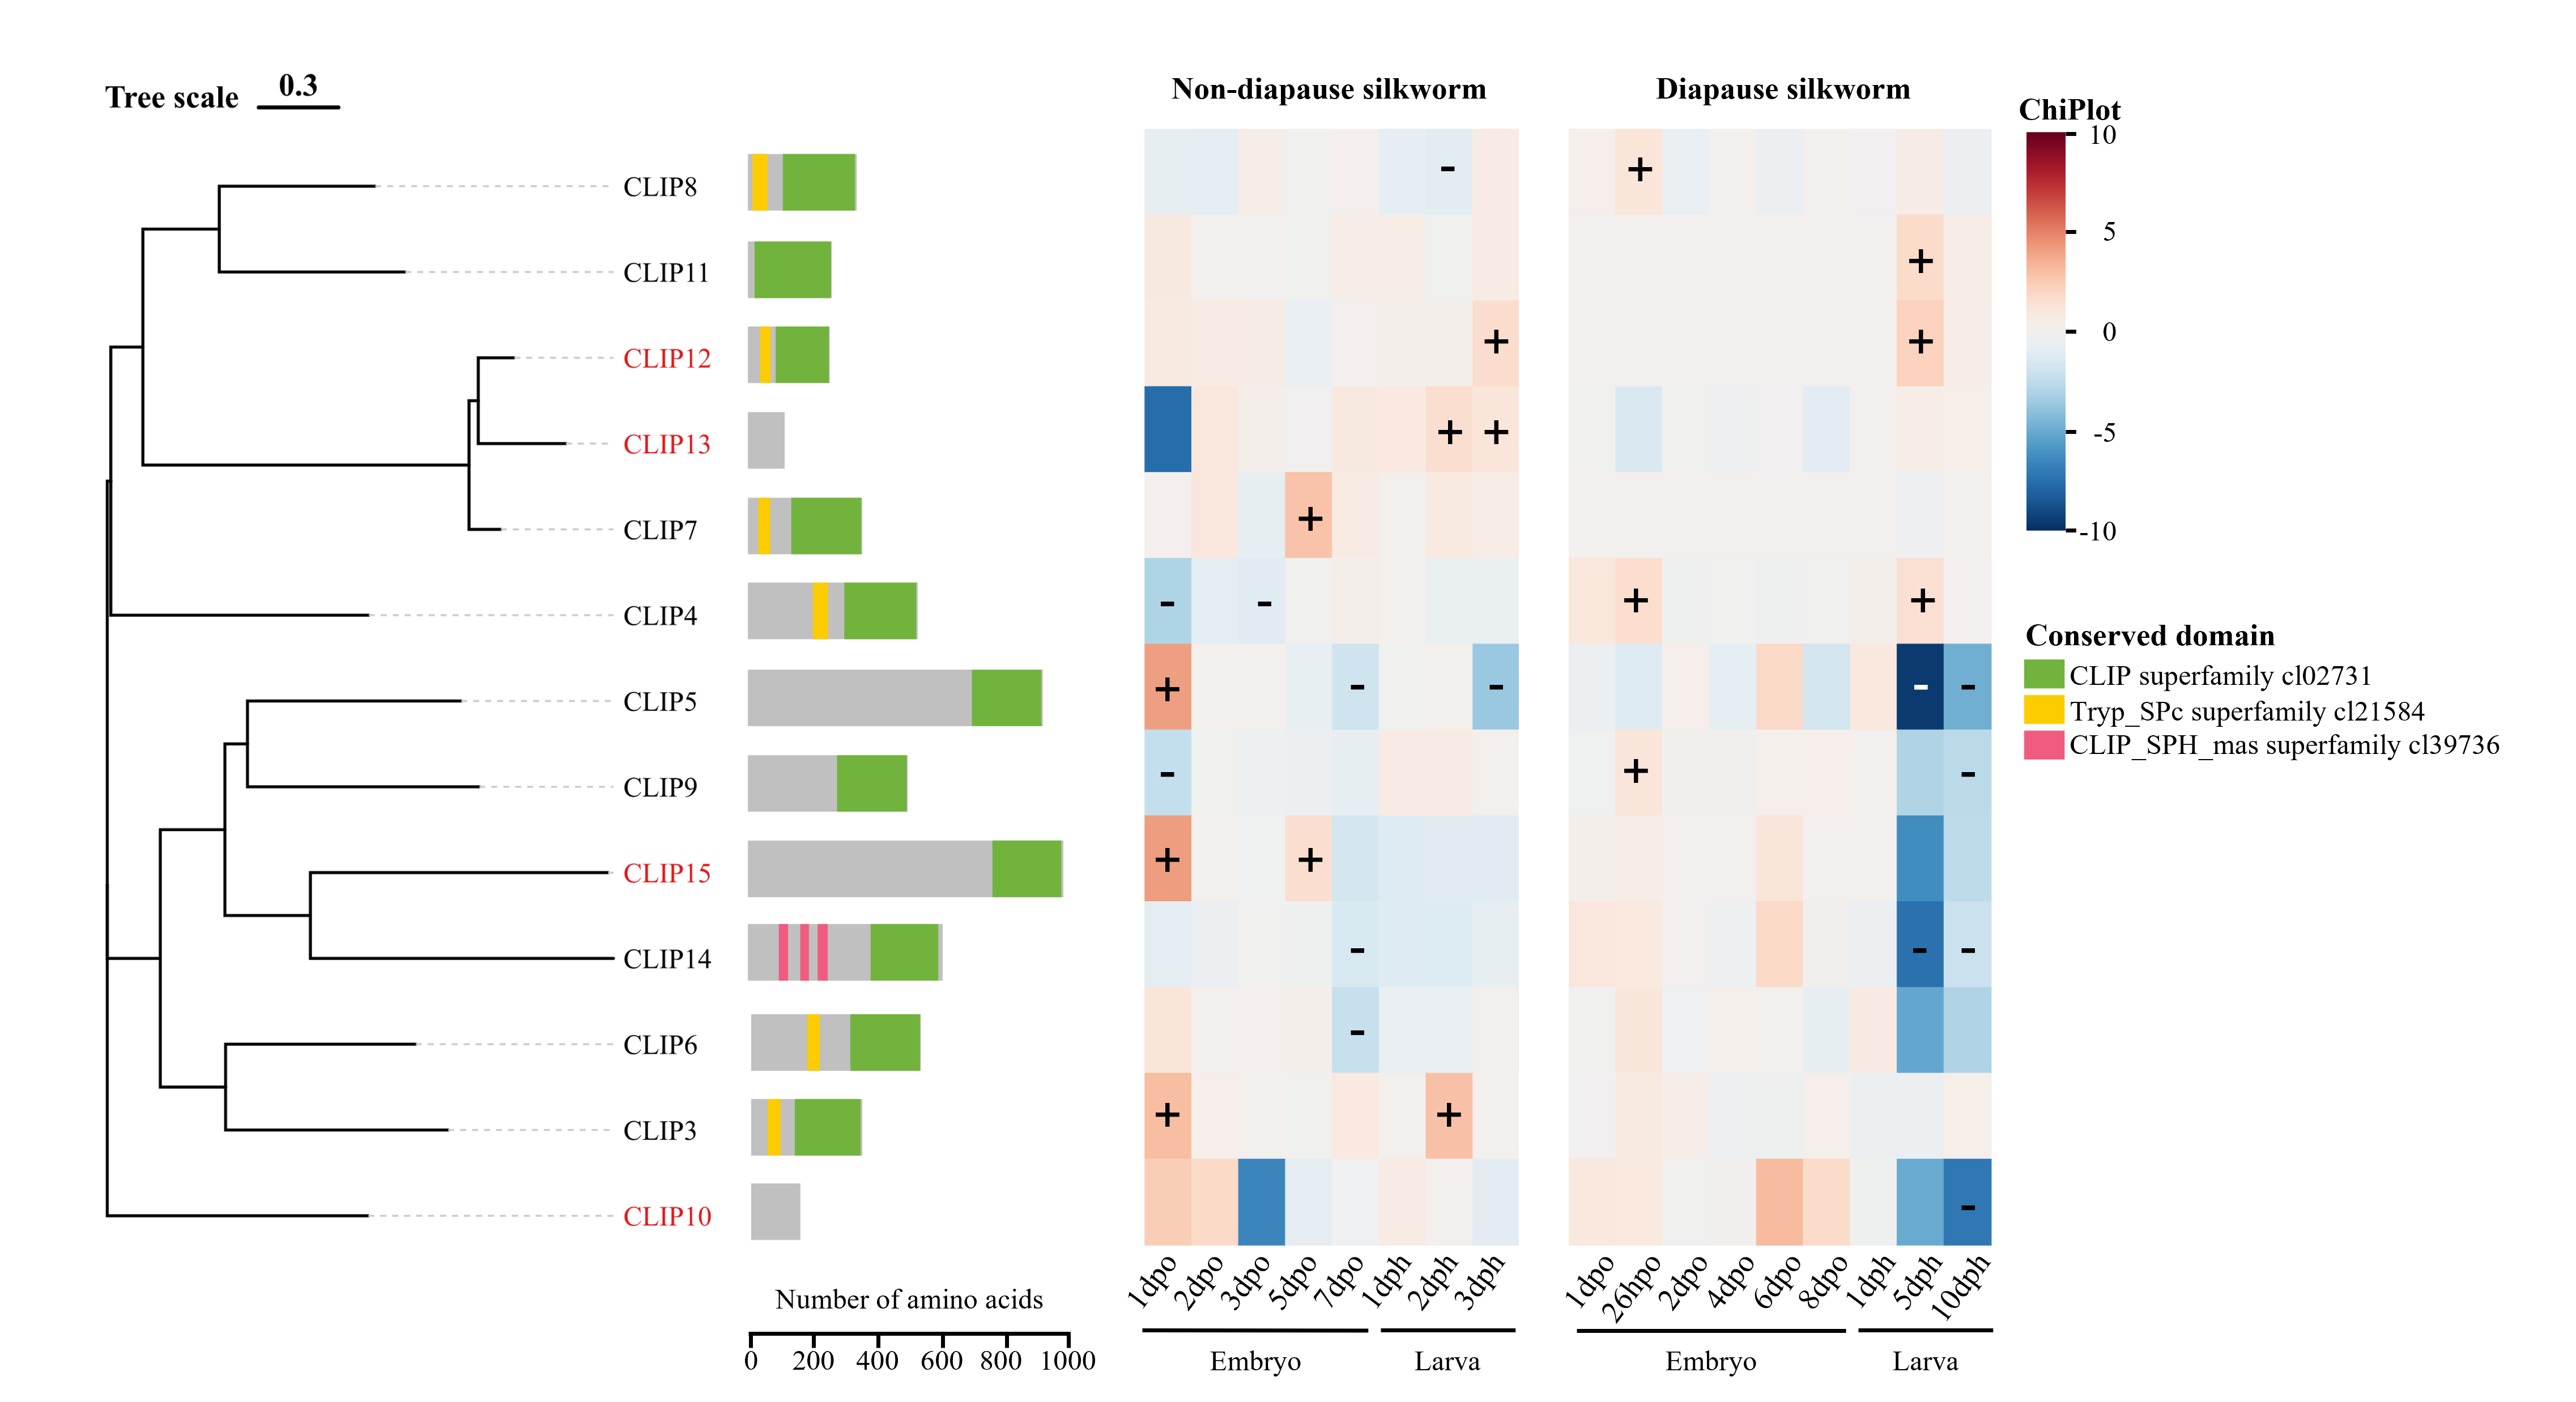


Fig. S7 Phylogenetic tree and expression analysis of *Serpins* protein family members in the silkworms with *N. bombycis* congenital infection. The phylogenetic tree was constructed using the maximum likelihood (ML) method and the JTT protein evolution model in MEGA11. Proteins containing signal peptides are highlighted in red. Colored blocks adjacent to each leaf indicate conserved domains or superfamilies within the corresponding proteins. Each color represents a distinct superfamily, with horizontal lines beneath the blocks denoting the amino acid length of the protein. Two heatmaps adjacent to the domain structures show the differential expression of *Serpins* in non-diapause and diapause silkworms. Each column represents a time-point, each row represents a gene. Significant upregulation relative to controls is indicated with a “+”, and significant downregulation with a “-”.


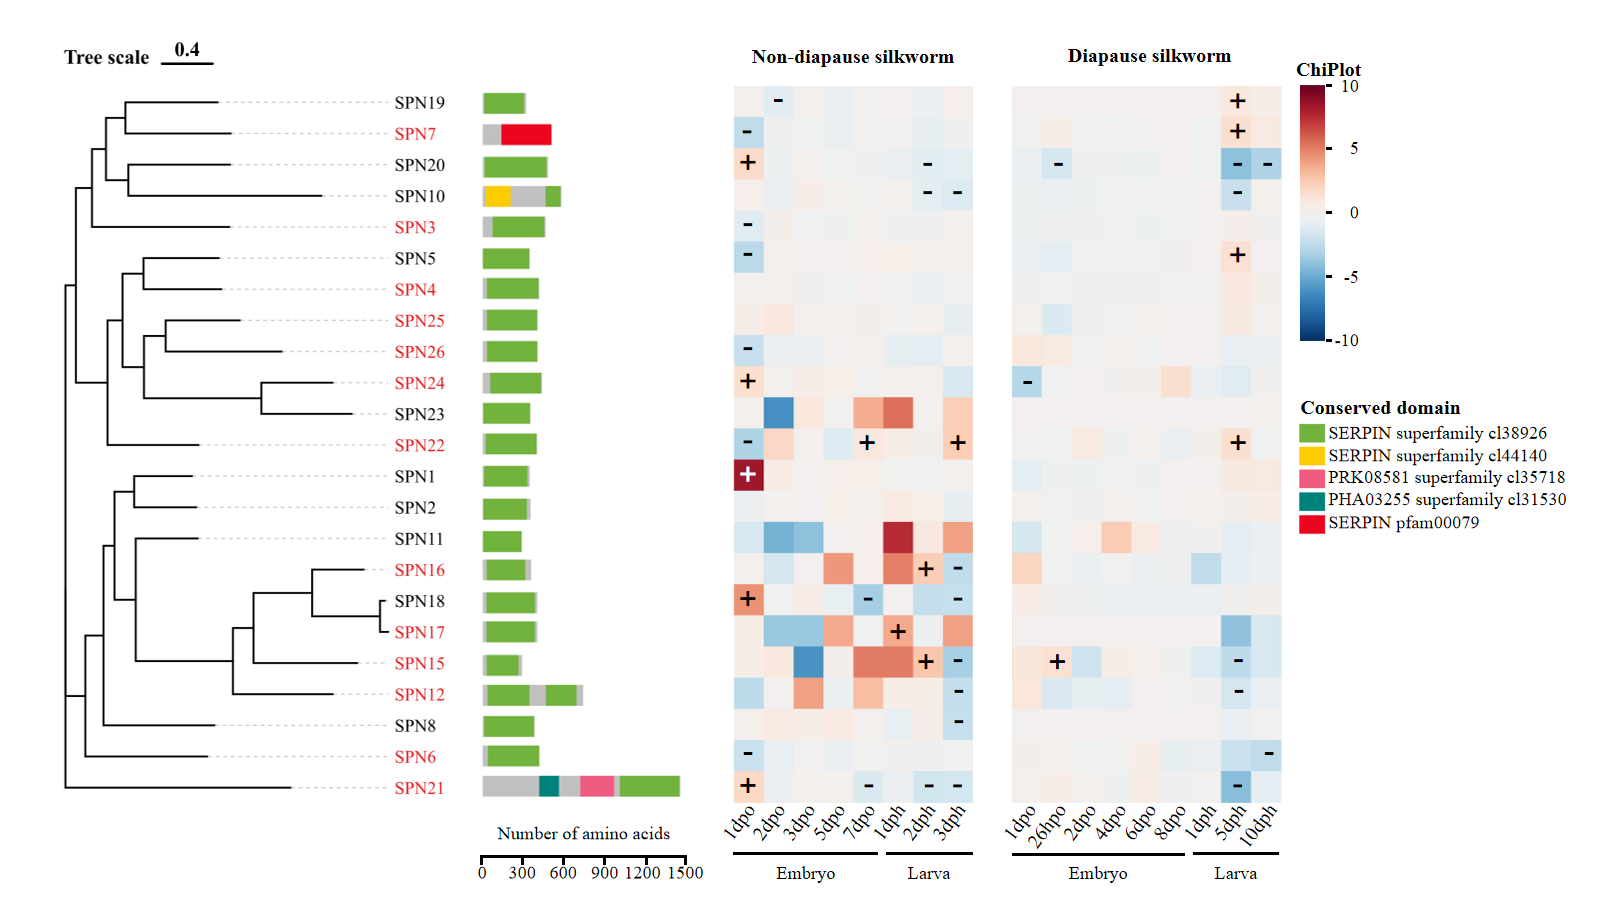


Table S1 qRT-PCR Primers of DEGs in non-diapause silkworms.

Table S2 The genes of *N. bombycis* predicted with signal peptides.

Table S3 Mapped reads of *N. bombycis* and silkworm in diapause silkworms.

Table S4 Mapped reads of *N. bombycis* and silkworm in non-diapause silkworms.

S1 Dataset TOP 100 of *N. bombycis* in non-diapause silkworms.

S2 Dataset DEGstes of *N. bombycis* in non-diapause silkworms.

S3 Dataset DEGsets of diapause silkworms.

S4 Dataset DEGsets of non-diapause silkworms.
