# Supplementary material for: Insights to Micropsoridia Nosema bombycis congenital infection and host immune responses in the embryo and larva stages of silkworms
Source: Research Square preprint supplement (doi:10.21203/rs.3.rs-5908051/v1), 2025-04-11
Supplement: Supplementary file 6 [file d72ddcef132f0fa965c9fe17.docx]

Table S5 The gene IDs of the genes involved in immune response of silkworms

Table S5A Gene IDs of the Recognition genes

| Gene Name | Gene ID |
| --- | --- |
| βGRP 1 | BGIBMGA011608 |
| βGRP 2 | BGIBMGA011609 |
| βGRP 3 | BGIBMGA011607 |
| βGRP 4 | BGIBMGA000353 |
| PGRP-L1 | BGIBMGA000583 |
| PGRP-L2 | BGIBMGA000584 |
| PGRP-L4 | BGIBMGA000585 |
| PGRP-L5 | BGIBMGA000586 |
| PGRP-L6 | BGIBMGA000673 |
| PGRP-S1 | BGIBMGA008038 |
| PGRP-S2 | BGIBMGA007987 |
| PGRP-S3 | BGIBMGA012864 |
| PGRP-S4 | BGIBMGA012865 |
| PGRP-S5 | BGIBMGA012866 |
| PGRP-S6 | BGIBMGA012867 |
| CTL1 | BGIBMGA002021 |
| CTL2 | BGIBMGA002138 |
| CTL3 | BGIBMGA003026 |
| CTL4 | BGIBMGA005948 |
| CTL5 | BGIBMGA005977 |
| CTL6 | BGIBMGA006033 |
| CTL7 | BGIBMGA003660 |
| CTL9 | BGIBMGA012488 |
| CTL10 | BGIBMGA006768 |
| CTL11 | BGIBMGA006623 |
| CTL12 | BGIBMGA011634 |
| CTL13 | BGIBMGA011958 |
| CTL15 | BGIBMGA002163 |
| CTL16 | BGIBMGA007553 |
| CTL17 | BGIBMGA003387 |
| CTL18 | BGIBMGA008247 |
| CTL19 | BGIBMGA002289 |
| CTL20 | BGIBMGA002288 |
| SCRAC1 | BGIBMGA005198 |
| SCRAC2 | BGIBMGA005199 |
| SCRAL1 | BGIBMGA010823 |
| SCRASP2 | BGIBMGA005824 |
| SCRASP4 | BGIBMGA003679 |
| SCRB1 | BGIBMGA000215 |
| SCRB2 | BGIBMGA001301 |
| SCRB3 | BGIBMGA010476 |
| SCRB4 | BGIBMGA010477 |
| SCRB5 | BGIBMGA011153 |
| SCRB6 | BGIBMGA011172 |
| SCRB7 | BGIBMGA011213 |
| SCRB8 | BGIBMGA011350 |
| SCRB9 | BGIBMGA011408 |
| SCRB10 | BGIBMGA012262 |
| SCRB11 | BGIBMGA013437 |
| SCRB12 | BGIBMGA013439 |
| SCRB13 | BGIBMGA013572 |
| SCRC | BGIBMGA004577 |

Table S5B Gene IDs of the Toll pathway genes

| Gene | Gene ID |
| --- | --- |
| Toll 3-1 | BGIBMGA010304 |
| Toll 3-2 | BGIBMGA014370 |
| Toll 3-3 | BGIBMGA014373 |
| Toll 6 | BGIBMGA011084 |
| Toll 7-1 | BGIBMGA011034 |
| Toll 7-2 | BGIBMGA011037 |
| Toll 7-3 | BGIBMGA011038 |
| Toll 8 | BGIBMGA011085 |
| Toll 9-1 | BGIBMGA011216 |
| Toll 9-2 | BGIBMGA008840 |
| Toll 10-2 | BGIBMGA011025 |
| Toll 10-3 | BGIBMGA011082 |
| Toll 12 | BGIBMGA006244 |
| Spz 1 | BGIBMGA002397 |
| Spz 2 | BGIBMGA012697 |
| Spz 3 | BGIBMGA010871 |
| Spz 4 | BGIBMGA008841 |
| Spz 6 | BGIBMGA013881 |
| Myd88 | BGIBMGA002869 |
| Pelle | BGIBMGA000063 |
| Tube | BGIBMGA002494 |
| TRAF2 | BGIBMGA001290 |
| TRAF3 | BGIBMGA009461 |
| Cactus | BGIBMGA005834 |
| RelA | BGIBMGA010496 |
| RelB | BGIBMGA010497 |

Table S5C Gene IDs of the IMD pathway genes

| Gene | Gene ID |
| --- | --- |
| Dredd | BGIBMGA006726 |
| Fadd | BGIBMGA000311 |
| IAP2 | BGIBMGA011523 |
| Tak1 | BGIBMGA008980 |
| Tab2 | BGIBMGA009044 |
| Ikk γ | BGIBMGA004180 |
| Ikk β | BGIBMGA008389 |
| IMD | BGIBMGA003655 |
| Relish | BGIBMGA002464 |

Table S5D Gene IDs of the JAK-STAT pathway genes

| Gene | Gene ID |
| --- | --- |
| Dome | BGIBMGA005642 |
| STAT | BGIBMGA001739 |
| Socs | BGIBMGA009619 |
| PIAS | BGIBMGA003997 |
| Hem | BGIBMGA002428 |
| Fos | BGIBMGA005140 |
| JNK | BGIBMGA007358 |
| Jun | BGIBMGA004164 |

Table S5E Gene IDs of the PPO pathway genes

| Gene | Gene ID |
| --- | --- |
| CLIP 1 | BGIBMGA013706 |
| CLIP 2 | BGIBMGA005172 |
| CLIP 3 | BGIBMGA010257 |
| CLIP 4 | BGIBMGA008668 |
| CLIP 5 | BGIBMGA009743 |
| CLIP 6 | BGIBMGA008673 |
| CLIP 7 | BGIBMGA010306 |
| CLIP 8 | BGIBMGA010546 |
| CLIP 9 | BGIBMGA011594 |
| CLIP 10 | BGIBMGA009677 |
| CLIP 11 | BGIBMGA013746 |
| CLIP 12 | BGIBMGA014436 |
| CLIP 13 | BGIBMGA014603 |
| CLIP 14 | BGIBMGA008665 |
| CLIP 15 | BGIBMGA011732 |
| SPN 1 | BGIBMGA009953 |
| SPN 2 | BGIBMGA007720 |
| SPN 3 | BGIBMGA010212 |
| SPN 4 | BGIBMGA013852 |
| SPN 5 | BGIBMGA013849 |
| SPN 6 | BGIBMGA007729 |
| SPN 7 | BGIBMGA010216 |
| SPN 8 | BGIBMGA001983 |
| SPN 10 | BGIBMGA003349 |
| SPN 11 | BGIBMGA004726 |
| SPN 12 | BGIBMGA004735 |
| SPN 15 | BGIBMGA008826 |
| SPN 16 | BGIBMGA008827 |
| SPN 17 | BGIBMGA008830 |
| SPN 18 | BGIBMGA008831 |
| SPN 19 | BGIBMGA010213 |
| SPN 20 | BGIBMGA010214 |
| SPN 21 | BGIBMGA011587 |
| SPN 22 | BGIBMGA013848 |
| SPN 23 | BGIBMGA013903 |
| SPN 24 | BGIBMGA013904 |
| SPN 25 | BGIBMGA013932 |
| SPN 26 | BGIBMGA013958 |
| lysozyme | BGIBMGA010439 |
| LLP 1 | BGIBMGA013892 |
| LLP 2 | BGIBMGA012264 |
| LLP 3 | BGIBMGA014001 |
| Reeler 1 | BGIBMGA014360 |
| PPAE | BGIBMGA013706 |
| PPO 1 | BGIBMGA012763 |
| PPO 2 | BGIBMGA013115 |

Table S5F Gene IDs of the Effector genes

| Gene | Gene ID |
| --- | --- |
| AttA | BGIBMGA002747 |
| AttB | BGIBMGA002739 |
| CecA1 | BGIBMGA006280 |
| CecA2 | BGIBMGA014285 |
| CecB1 | BGIBMGA000024 |
| CecB2 | BGIBMGA000023 |
| CecB3 | BGIBMGA000021 |
| CecB4 | BGIBMGA000036 |
| CecB5 | BGIBMGA000037 |
| CecB6 | BGIBMGA000038 |
| CecC | BGIBMGA000020 |
| CecD | BGIBMGA000017 |
| Enb1 | BGIBMGA000018 |
| Enb2 | BGIBMGA000039 |
| Glv1 | BGIBMGA013863 |
| Glv2 | BGIBMGA005658 |
| Glv3 | BGIBMGA013803 |
| Glv4 | BGIBMGA013865 |
| Defensin | BGIBMGA009643 |
| Leb | BGIBMGA006775 |
| Moricin | BGIBMGA011495 |
| morLP-B1 | BGIBMGA011516 |
| morLP-B2 | BGIBMGA011517 |
| morLP-B3 | BGIBMGA011518 |
| morLP-B4 | BGIBMGA011519 |
| morLP-B5 | BGIBMGA011520 |
| morLP-B6 | BGIBMGA011521 |
