# Supplementary material for: Insights to Micropsoridia Nosema bombycis congenital infection and host immune responses in the embryo and larva stages of silkworms
Source: Research Square preprint supplement (doi:10.21203/rs.3.rs-5908051/v1), 2025-04-11
Supplement: Supplementary file 7 [file f1a369184a31d76bb4316141.xlsx]

## Sheet: Sheet1
EOB11143.1 hypothetical protein NBO_1591g0001 _Nosema bombycis CQ1_
EOB11160.1 hypothetical protein NBO_1556g0002 _Nosema bombycis CQ1_
EOB11161.1 hypothetical protein NBO_1556g0003 _Nosema bombycis CQ1_
EOB11181.1 hypothetical protein NBO_1508g0001 _Nosema bombycis CQ1_
EOB11184.1 hypothetical protein NBO_1506g0002 _Nosema bombycis CQ1_
EOB11189.1 Peptidase aspartic NBO_1486g0002 _Nosema bombycis CQ1_
EOB11214.1 hypothetical protein NBO_1435g0001 _Nosema bombycis CQ1_
EOB11264.1 threonyl-tRNA synthetase NBO_1332gi002 _Nosema bombycis CQ1_
EOB11276.1 Hexokinase-2 NBO_1320g0001 _Nosema bombycis CQ1_
EOB11313.1 hypothetical protein NBO_1296g0001 _Nosema bombycis CQ1_
EOB11331.1 hypothetical protein NBO_1282g0001 _Nosema bombycis CQ1_
EOB11438.1 hypothetical protein NBO_1183g0001 _Nosema bombycis CQ1_
EOB11439.1 hypothetical protein NBO_1182g0001 _Nosema bombycis CQ1_
EOB11480.1 hypothetical protein NBO_1144g0001 _Nosema bombycis CQ1_
EOB11485.1 hypothetical protein NBO_1135g0001 _Nosema bombycis CQ1_
EOB11488.1 Ricin B lectin NBO_1133g0001 _Nosema bombycis CQ1_
EOB11510.1 hypothetical protein NBO_1115g0003 _Nosema bombycis CQ1_
EOB11548.1 hypothetical protein NBO_1071g0001 _Nosema bombycis CQ1_
EOB11572.1 Nuclear pore complex protein Nup98-Nup96 NBO_1053g0002 _Nosema bombycis CQ1_
EOB11654.1 Polysaccharide deacetylase NBO_974g0001 _Nosema bombycis CQ1_
EOB11665.1 Polar tube protein 2 NBO_943g0003 _Nosema bombycis CQ1_
EOB11666.1 Polar tube protein 1 NBO_943g0004_Nosema bombycis CQ1_
EOB11723.1 hypothetical protein NBO_923g0001 _Nosema bombycis CQ1_
EOB11795.1 hypothetical protein NBO_820g0002 _Nosema bombycis CQ1_
EOB11804.1 hypothetical protein NBO_807g0001 _Nosema bombycis CQ1_
EOB11824.1 hypothetical protein NBO_762g0001, partial _Nosema bombycis CQ1_
EOB11847.1 hypothetical protein NBO_732g0001 _Nosema bombycis CQ1_
EOB11852.1 hypothetical protein NBO_721g0001 _Nosema bombycis CQ1_
EOB11870.1 hypothetical protein NBO_704g0001 _Nosema bombycis CQ1_
EOB11875.1 hypothetical protein NBO_699g0001 _Nosema bombycis CQ1_
EOB11882.1 hypothetical protein NBO_693g0002 _Nosema bombycis CQ1_
EOB11903.1 hypothetical protein NBO_655g0001, partial _Nosema bombycis CQ1_
EOB11925.1 hypothetical protein NBO_632g0002 _Nosema bombycis CQ1_
EOB11929.1 endoplasmic reticulum membrane protein NBO_629g0002 _Nosema bombycis CQ1_
EOB11944.1 hypothetical protein NBO_622g0001 _Nosema bombycis CQ1_
EOB11945.1 hypothetical protein NBO_622g0002 _Nosema bombycis CQ1_
EOB11959.1 hypothetical protein NBO_613g0001 _Nosema bombycis CQ1_
EOB11960.1 hypothetical protein NBO_613g0002 _Nosema bombycis CQ1_
EOB11967.1 hypothetical protein NBO_611g0003 _Nosema bombycis CQ1_
EOB11979.1 hypothetical protein NBO_607g0001 _Nosema bombycis CQ1_
EOB12016.1 hypothetical protein NBO_589g0001 _Nosema bombycis CQ1_
EOB12017.1 hypothetical protein NBO_589g0002 _Nosema bombycis CQ1_
EOB12028.1 hypothetical protein NBO_584g0003 _Nosema bombycis CQ1_
EOB12056.1 hypothetical protein NBO_569g0002 _Nosema bombycis CQ1_
EOB12060.1 Spore wall and anchoring disk complex protein NBO_568g0002 _Nosema bombycis CQ1_
EOB12066.1 hypothetical protein NBO_561g0001 _Nosema bombycis CQ1_
EOB12081.1 hypothetical protein NBO_555g0003 _Nosema bombycis CQ1_
EOB12086.1 endoplasmic reticulum membrane protein NBO_554g0003 _Nosema bombycis CQ1_
EOB12094.1 putative spore wall protein 5 NBO_552g0002 _Nosema bombycis CQ1_
EOB12097.1 Spore wall protein 1 NBO_552g0005 _Nosema bombycis CQ1_
EOB12150.1 Ricin B lectin NBO_508g0001 _Nosema bombycis CQ1_
EOB12179.1 hypothetical protein NBO_508g0030 _Nosema bombycis CQ1_
EOB12199.1 DNA-directed RNA polymerase NBO_507g0014 _Nosema bombycis CQ1_
EOB12217.1 hypothetical protein NBO_501g0009 _Nosema bombycis CQ1_
EOB12227.1 hypothetical protein NBO_495g0001 _Nosema bombycis CQ1_
EOB12228.1 hypothetical protein NBO_495g0002 _Nosema bombycis CQ1_
EOB12244.1 hypothetical protein NBO_490g0001 _Nosema bombycis CQ1_
EOB12258.1 hypothetical protein NBO_484g0003 _Nosema bombycis CQ1_
EOB12296.1 hypothetical protein NBO_468g0003 _Nosema bombycis CQ1_
EOB12319.1 hypothetical protein NBO_464g0006 _Nosema bombycis CQ1_
EOB12325.1 Ricin B lectin NBO_463g0004 _Nosema bombycis CQ1_
EOB12326.1 hypothetical protein NBO_463g0005 _Nosema bombycis CQ1_
EOB12334.1 hypothetical protein NBO_462g0003 _Nosema bombycis CQ1_
EOB12338.1 putative spore wall protein 13 NBO_462g0007 _Nosema bombycis CQ1_
EOB12342.1 hypothetical protein NBO_461g0002 _Nosema bombycis CQ1_
EOB12355.1 hypothetical protein NBO_459g0001, partial _Nosema bombycis CQ1_
EOB12372.1 hypothetical protein NBO_455g0001 _Nosema bombycis CQ1_
EOB12387.1 hypothetical protein NBO_452g0004 _Nosema bombycis CQ1_
EOB12397.1 hypothetical protein NBO_451g0008 _Nosema bombycis CQ1_
EOB12399.1 hypothetical protein NBO_451g0010 _Nosema bombycis CQ1_
EOB12412.1 hypothetical protein NBO_447g0004 _Nosema bombycis CQ1_
EOB12477.1 hypothetical protein NBO_431g0002 _Nosema bombycis CQ1_
EOB12494.1 hypothetical protein NBO_424g0002 _Nosema bombycis CQ1_
EOB12508.1 hypothetical protein NBO_421g0004 _Nosema bombycis CQ1_
EOB12513.1 hypothetical protein NBO_420g0003 _Nosema bombycis CQ1_
EOB12514.1 hypothetical protein NBO_419g0001 _Nosema bombycis CQ1_
EOB12526.1 hypothetical protein NBO_419g0013 _Nosema bombycis CQ1_
EOB12529.1 Protein with DEXDc plus ring plus HELICc NBO_418g0003 _Nosema bombycis CQ1_
EOB12553.1 hypothetical protein NBO_417g0016 _Nosema bombycis CQ1_
EOB12579.1 hypothetical protein NBO_403g0001 _Nosema bombycis CQ1_
EOB12600.1 hypothetical protein NBO_399g0001 _Nosema bombycis CQ1_
EOB12621.1 hypothetical protein NBO_395g0004 _Nosema bombycis CQ1_
EOB12627.1 hypothetical protein NBO_394g0002 _Nosema bombycis CQ1_
EOB12642.1 hypothetical protein NBO_389g0012 _Nosema bombycis CQ1_
EOB12649.1 Putative tyrosinase-like protein tyr-3 NBO_386g0006 _Nosema bombycis CQ1_
EOB12658.1 hypothetical protein NBO_386g0015 _Nosema bombycis CQ1_
EOB12691.1 hypothetical protein NBO_378g0002 _Nosema bombycis CQ1_
EOB12692.1 hypothetical protein NBO_378g0003 _Nosema bombycis CQ1_
EOB12697.1 hypothetical protein NBO_378g0008 _Nosema bombycis CQ1_
EOB12710.1 hypothetical protein NBO_377g0005 _Nosema bombycis CQ1_
EOB12712.1 hypothetical protein NBO_376g0001 _Nosema bombycis CQ1_
EOB12713.1 hypothetical protein NBO_376g0002 _Nosema bombycis CQ1_
EOB12756.1 hypothetical protein NBO_370g0002 _Nosema bombycis CQ1_
EOB12825.1 hypothetical protein NBO_362g0010 _Nosema bombycis CQ1_
EOB12843.1 hypothetical protein NBO_359g0002 _Nosema bombycis CQ1_
EOB12844.1 hypothetical protein NBO_359g0003 _Nosema bombycis CQ1_
EOB12845.1 hypothetical protein NBO_359g0004 _Nosema bombycis CQ1_
EOB12846.1 Polycystic kidney disease protein 1-like 3 NBO_359g0005 _Nosema bombycis CQ1_
EOB12849.1 hypothetical protein NBO_359g0008 _Nosema bombycis CQ1_
EOB12854.1 hypothetical protein NBO_355g0002 _Nosema bombycis CQ1_
EOB12855.1 hypothetical protein NBO_355g0003 _Nosema bombycis CQ1_
EOB12856.1 hypothetical protein NBO_355g0004 _Nosema bombycis CQ1_
EOB12857.1 hypothetical protein NBO_354g0001 _Nosema bombycis CQ1_
EOB12862.1 Acid phosphatase-like protein 2, partial NBO_353g0004 _Nosema bombycis CQ1_
EOB12868.1 hypothetical protein NBO_352g0001 _Nosema bombycis CQ1_
EOB12900.1 hypothetical protein NBO_331g0001 _Nosema bombycis CQ1_
EOB12901.1 hypothetical protein NBO_331g0002 _Nosema bombycis CQ1_
EOB12917.1 Chaperone protein focC NBO_316g0002 _Nosema bombycis CQ1_
EOB12919.1 Outer membrane usher protein fimD NBO_316g0004 _Nosema bombycis CQ1_
EOB12924.1 Endoglucanase NBO_313g0001 _Nosema bombycis CQ1_
EOB12931.1 Protein bax NBO_308g0001 _Nosema bombycis CQ1_
EOB12959.1 hypothetical protein NBO_293g0001 _Nosema bombycis CQ1_
EOB12960.1 hypothetical protein NBO_293g0002 _Nosema bombycis CQ1_
EOB12961.1 hypothetical protein NBO_293g0003 _Nosema bombycis CQ1_
EOB12978.1 protein disulfide isomerase NBO_283gi001 _Nosema bombycis CQ1_
EOB12980.1 hypothetical protein NBO_281g0001 _Nosema bombycis CQ1_
EOB13023.1 Soluble cytochrome b562 NBO_250g0001 _Nosema bombycis CQ1_
EOB13043.1 hypothetical protein NBO_232g0001 _Nosema bombycis CQ1_
EOB13055.1 hypothetical protein NBO_222g0001 _Nosema bombycis CQ1_
EOB13067.1 hypothetical protein NBO_218g0003 _Nosema bombycis CQ1_
EOB13068.1 hypothetical protein NBO_218g0004 _Nosema bombycis CQ1_
EOB13119.1 hypothetical protein NBO_172g0001 _Nosema bombycis CQ1_
EOB13131.1 Polysaccharide deacetylase NBO_166g0001 _Nosema bombycis CQ1_
EOB13175.1 hypothetical protein NBO_141g0001 _Nosema bombycis CQ1_
EOB13180.1 hypothetical protein NBO_137g0001 _Nosema bombycis CQ1_
EOB13197.1 Periplasmic protein NBO_123g0002 _Nosema bombycis CQ1_
EOB13199.1 hypothetical protein NBO_119g0001 _Nosema bombycis CQ1_
EOB13213.1 protein disulfide isomerase NBO_111g0004 _Nosema bombycis CQ1_
EOB13271.1 hypothetical protein NBO_86g0006 _Nosema bombycis CQ1_
EOB13295.1 hypothetical protein NBO_84g0013 _Nosema bombycis CQ1_
EOB13300.1 hypothetical protein NBO_83g0004 _Nosema bombycis CQ1_
EOB13301.1 hypothetical protein NBO_83g0005 _Nosema bombycis CQ1_
EOB13330.1 hypothetical protein NBO_81g0023 _Nosema bombycis CQ1_
EOB13332.1 hypothetical protein NBO_81g0025 _Nosema bombycis CQ1_
EOB13334.1 hypothetical protein NBO_81g0027 _Nosema bombycis CQ1_
EOB13336.1 hypothetical protein NBO_81g0029 _Nosema bombycis CQ1_
EOB13374.1 hypothetical protein NBO_78g0001 _Nosema bombycis CQ1_
EOB13381.1 hypothetical protein NBO_78g0008 _Nosema bombycis CQ1_
EOB13388.1 hypothetical protein NBO_78g0014 _Nosema bombycis CQ1_
EOB13416.1 hypothetical protein NBO_76g0021 _Nosema bombycis CQ1_
EOB13417.1 hypothetical protein NBO_76g0022 _Nosema bombycis CQ1_
EOB13421.1 threonyl-tRNA synthetase NBO_76gi004 _Nosema bombycis CQ1_
EOB13486.1 Isoleucyl-tRNA synthetase, cytoplasmic, partial NBO_71g0001 _Nosema bombycis CQ1_
EOB13501.1 hypothetical protein NBO_70g0010 _Nosema bombycis CQ1_
EOB13538.1 hypothetical protein NBO_67g0013 _Nosema bombycis CQ1_
EOB13566.1 hypothetical protein NBO_66g0025 _Nosema bombycis CQ1_
EOB13589.1 hypothetical protein NBO_66g0048 _Nosema bombycis CQ1_
EOB13590.1 hypothetical protein NBO_66g0049 _Nosema bombycis CQ1_
EOB13591.1 hypothetical protein NBO_66g0050 _Nosema bombycis CQ1_
EOB13597.1 Putative protein disulfide-isomerase NBO_65g0001 _Nosema bombycis CQ1_
EOB13612.1 hypothetical protein NBO_65g0016 _Nosema bombycis CQ1_
EOB13615.1 hypothetical protein NBO_65g0019, partial _Nosema bombycis CQ1_
EOB13617.1 hypothetical protein NBO_65g0021 _Nosema bombycis CQ1_
EOB13621.1 Putative membrane protein ycf1 NBO_64g0003 _Nosema bombycis CQ1_
EOB13699.1 hypothetical protein NBO_63g0018 _Nosema bombycis CQ1_
EOB13700.1 cell apoptosis-related protein NBO_63g0019 _Nosema bombycis CQ1_
EOB13721.1 hypothetical protein NBO_62g0011 _Nosema bombycis CQ1_
EOB13727.1 hypothetical protein NBO_62g0017 _Nosema bombycis CQ1_
EOB13737.1 hypothetical protein NBO_61g0008 _Nosema bombycis CQ1_
EOB13762.1 Polysaccharide deacetylase NBO_60g0018 _Nosema bombycis CQ1_
EOB13780.1 hypothetical protein NBO_59g0004 _Nosema bombycis CQ1_
EOB13817.1 hypothetical protein NBO_58g0022 _Nosema bombycis CQ1_
EOB13818.1 hypothetical protein NBO_58g0023 _Nosema bombycis CQ1_
EOB13825.1 hypothetical protein NBO_57g0002 _Nosema bombycis CQ1_
EOB13848.1 hypothetical protein NBO_55g0012 _Nosema bombycis CQ1_
EOB13880.1 Polysaccharide deacetylase NBO_53g0005 _Nosema bombycis CQ1_
EOB13963.1 hypothetical protein NBO_48g0013, partial _Nosema bombycis CQ1_
EOB14000.1 hypothetical protein NBO_43g0005 _Nosema bombycis CQ1_
EOB14014.1 hypothetical protein NBO_42g0004 _Nosema bombycis CQ1_
EOB14068.1 Acidic endochitinase SP2, partial NBO_41g0043 _Nosema bombycis CQ1_
EOB14080.1 hypothetical protein NBO_40g0001 _Nosema bombycis CQ1_
EOB14081.1 hypothetical protein NBO_40g0002 _Nosema bombycis CQ1_
EOB14094.1 hypothetical protein NBO_38g0005 _Nosema bombycis CQ1_
EOB14103.1 hypothetical protein NBO_38g0014 _Nosema bombycis CQ1_
EOB14133.1 Meiotically up-regulated gene 89 protein NBO_37g0008 _Nosema bombycis CQ1_
EOB14180.1 hypothetical protein NBO_34g0030 _Nosema bombycis CQ1_
EOB14218.1 hypothetical protein NBO_33g0024 _Nosema bombycis CQ1_
EOB14221.1 hypothetical protein NBO_33g0027 _Nosema bombycis CQ1_
EOB14225.1 hypothetical protein NBO_33g0030 _Nosema bombycis CQ1_
EOB14232.1 hypothetical protein NBO_32g0007 _Nosema bombycis CQ1_
EOB14236.1 hypothetical protein NBO_32g0011, partial _Nosema bombycis CQ1_
EOB14237.1 hypothetical protein NBO_32g0012 _Nosema bombycis CQ1_
EOB14247.1 Glutaredoxin NBO_32g0022 _Nosema bombycis CQ1_
EOB14267.1 hypothetical protein NBO_32g0042 _Nosema bombycis CQ1_
EOB14268.1 hypothetical protein NBO_32g0043 _Nosema bombycis CQ1_
EOB14277.1 threonyl-tRNA synthetase NBO_32gi001 _Nosema bombycis CQ1_
EOB14330.1 hypothetical protein NBO_29g0013 _Nosema bombycis CQ1_
EOB14338.1 Spore wall and anchoring disk complex protein NBO_29g0021 _Nosema bombycis CQ1_
EOB14348.1 hypothetical protein NBO_29g0030 _Nosema bombycis CQ1_
EOB14358.1 hypothetical protein NBO_29g0040 _Nosema bombycis CQ1_
EOB14359.1 hypothetical protein NBO_29g0041 _Nosema bombycis CQ1_
EOB14369.1 hypothetical protein NBO_28g0008 _Nosema bombycis CQ1_
EOB14382.1 hypothetical protein NBO_28g0021 _Nosema bombycis CQ1_
EOB14400.1 hypothetical protein NBO_28g0039 _Nosema bombycis CQ1_
EOB14405.1 hypothetical protein NBO_28g0044 _Nosema bombycis CQ1_
EOB14407.1 hypothetical protein NBO_28g0046 _Nosema bombycis CQ1_
EOB14408.1 hypothetical protein NBO_28g0047 _Nosema bombycis CQ1_
EOB14409.1 hypothetical protein NBO_28g0048 _Nosema bombycis CQ1_
EOB14417.1 hypothetical protein NBO_28g0056 _Nosema bombycis CQ1_
EOB14418.1 hypothetical protein NBO_28g0057 _Nosema bombycis CQ1_
EOB14430.1 hypothetical protein NBO_28g0069 _Nosema bombycis CQ1_
EOB14478.1 putative spore wall protein 5 NBO_27g0035 _Nosema bombycis CQ1_
EOB14505.1 Acid phosphatase-like protein 2 NBO_27g0060 _Nosema bombycis CQ1_
EOB14589.1 hypothetical protein NBO_24g0034 _Nosema bombycis CQ1_
EOB14616.1 Bifunctional xylanase_deacetylase NBO_20g0004 _Nosema bombycis CQ1_
EOB14674.1 hypothetical protein NBO_18g0001 _Nosema bombycis CQ1_
EOB14679.1 hypothetical protein NBO_18g0006 _Nosema bombycis CQ1_
EOB14689.1 hypothetical protein NBO_18g0016 _Nosema bombycis CQ1_
EOB14717.1 hypothetical protein NBO_16g0003 _Nosema bombycis CQ1_
EOB14738.1 hypothetical protein NBO_16g0024 _Nosema bombycis CQ1_
EOB14742.1 hypothetical protein NBO_16g0028 _Nosema bombycis CQ1_
EOB14782.1 Putative tyrosinase-like protein tyr-3 NBO_16g0067 _Nosema bombycis CQ1_
EOB14798.1 hypothetical protein NBO_15g0010 _Nosema bombycis CQ1_
EOB14814.1 hypothetical protein NBO_14g0001 _Nosema bombycis CQ1_
EOB14842.1 hypothetical protein NBO_13g0019 _Nosema bombycis CQ1_
EOB14873.1 hypothetical protein NBO_13g0050 _Nosema bombycis CQ1_
EOB14875.1 hypothetical protein NBO_13g0052 _Nosema bombycis CQ1_
EOB14898.1 hypothetical protein NBO_12g0004 _Nosema bombycis CQ1_
EOB14910.1 hypothetical protein NBO_12g0016 _Nosema bombycis CQ1_
EOB14921.1 hypothetical protein NBO_12g0027 _Nosema bombycis CQ1_
EOB14957.1 hypothetical protein NBO_11g0029 _Nosema bombycis CQ1_
EOB14960.1 Peptidase S8 and S53, subtilisin, kexin, sedolisin NBO_11g0032 _Nosema bombycis CQ1_
EOB15006.1 hypothetical protein NBO_11g0077 _Nosema bombycis CQ1_
EOB15007.1 hypothetical protein NBO_11g0078 _Nosema bombycis CQ1_
EOB15014.1 hypothetical protein NBO_10g0005 _Nosema bombycis CQ1_
EOB15049.1 NUDIX hydrolase NBO_10g0039 _Nosema bombycis CQ1_
EOB15070.1 hypothetical protein NBO_10g0060 _Nosema bombycis CQ1_
EOB15080.1 Thioredoxin NBO_10g0070 _Nosema bombycis CQ1_
EOB15107.1 hypothetical protein NBO_10g0097 _Nosema bombycis CQ1_
EOB15113.1 hypothetical protein NBO_10g0103 _Nosema bombycis CQ1_
EOB15115.1 hypothetical protein NBO_10g0105 _Nosema bombycis CQ1_
EOB15116.1 hypothetical protein NBO_10g0106 _Nosema bombycis CQ1_
EOB15123.1 Trehalase NBO_10g0113 _Nosema bombycis CQ1_
EOB15151.1 hypothetical protein NBO_8g0016 _Nosema bombycis CQ1_
EOB15152.1 hypothetical protein NBO_8g0017 _Nosema bombycis CQ1_
EOB15187.1 hypothetical protein NBO_7g0005 _Nosema bombycis CQ1_
EOB15188.1 hypothetical protein NBO_7g0006 _Nosema bombycis CQ1_
EOB15197.1 Polar tube protein 2 NBO_7g0015 _Nosema bombycis CQ1_
EOB15198.1 Polar tube protein 1 NBO_7g0016 _Nosema bombycis CQ1_
EOB15220.1 hypothetical protein NBO_7g0038 _Nosema bombycis CQ1_
EOB15229.1 hypothetical protein NBO_7g0047 _Nosema bombycis CQ1_
EOB15230.1 hypothetical protein NBO_7g0048 _Nosema bombycis CQ1_
EOB15231.1 hypothetical protein NBO_7g0049 _Nosema bombycis CQ1_
EOB15233.1 hypothetical protein NBO_7g0051 _Nosema bombycis CQ1_
EOB15236.1 hypothetical protein NBO_7g0057 _Nosema bombycis CQ1_
EOB15257.1 hypothetical protein NBO_6g0010 _Nosema bombycis CQ1_
EOB15258.1 hypothetical protein NBO_6g0011 _Nosema bombycis CQ1_
EOB15261.1 putative spore wall protein 13 _Nosema bombycis CQ1_
EOB15289.1 Ricin B lectin NBO_6g0041 _Nosema bombycis CQ1_
EOB15297.1 Ricin B lectin NBO_6g0049 _Nosema bombycis CQ1_
EOB15308.1 hypothetical protein NBO_6g0060 _Nosema bombycis CQ1_
EOB15339.1 hypothetical protein NBO_6g0090 _Nosema bombycis CQ1_
EOB15361.1 hypothetical protein NBO_6g0111 _Nosema bombycis CQ1_
EOB15362.1 hypothetical protein NBO_6g0112 _Nosema bombycis CQ1_
EOB15365.1 hypothetical protein NBO_6g0115 _Nosema bombycis CQ1_
EOB15412.1 hypothetical protein NBO_4g0040 _Nosema bombycis CQ1_
EOB15430.1 hypothetical protein NBO_4g0058 _Nosema bombycis CQ1_
EOB15434.1 hypothetical protein NBO_4g0062 _Nosema bombycis CQ1_
EOB15448.1 hypothetical protein NBO_4g0076 _Nosema bombycis CQ1_
EOB15465.1 hypothetical protein NBO_3g0016 _Nosema bombycis CQ1_
EOB15473.1 hypothetical protein NBO_3g0024 _Nosema bombycis CQ1_
EOB15474.1 hypothetical protein NBO_3g0025 _Nosema bombycis CQ1_
EOB15480.1 hypothetical protein NBO_3g0031 _Nosema bombycis CQ1_
EOB15494.1 hypothetical protein NBO_3g0045 _Nosema bombycis CQ1_
EOB15495.1 hypothetical protein NBO_3g0046 _Nosema bombycis CQ1_
EOB15503.1 hypothetical protein NBO_3g0054 _Nosema bombycis CQ1_
EOB15505.1 hypothetical protein NBO_3g0056 _Nosema bombycis CQ1_
EOB15565.1 hypothetical protein NBO_2g0056 _Nosema bombycis CQ1_
EOB15568.1 Proteoglycan-4 NBO_2g0059 _Nosema bombycis CQ1_
EOB15569.1 hypothetical protein NBO_2g0060 _Nosema bombycis CQ1_
EOB15571.1 hypothetical protein NBO_2g0062 _Nosema bombycis CQ1_
EOB15572.1 hypothetical protein NBO_2g0063 _Nosema bombycis CQ1_
EOB15574.1 hypothetical protein NBO_2g0065 _Nosema bombycis CQ1_
EOB15580.1 hypothetical protein NBO_2g0071 _Nosema bombycis CQ1_
EOB15582.1 hypothetical protein NBO_2g0073 _Nosema bombycis CQ1_
EOB15584.1 hypothetical protein NBO_2g0075 _Nosema bombycis CQ1_
EOB15585.1 hypothetical protein NBO_2g0076 _Nosema bombycis CQ1_
